# Supplementary material for: Eoarchean/Hadean melts reveal arc-like trace element and isotopic chemistry
Source: Research Square preprint supplement (doi:10.21203/rs.3.rs-1610334/v1), 2022-05-31
Supplement: Supplementary file 3 [file 9dd5fdd4198a7dfc6887e453.xlsx]

## Sheet: Tab st1
	This study (1100 °C)			This study (1300 °C)			Burnham and Berry, 2012			Padilla and Gualda, 2016
Element	D (± 2 s.e.)			D (± 2 s.e.)			D (± 2 s.e.)			D
Al	0.000466675	±	0.000239443	0.000939716	±	0.000178521	-		-	0.041
Sr	0.000231364	±	0.000148864	6.60304e-05	±	2.66449e-05	0.00063	±	0.0007	-
Y	2.89676	±	0.613296	1.66788	±	0.259138	2.1	±	2	80
Nb	0.0331187	±	0.00626208	0.0106839	±	0.00128758	0.089	±	0.038	0.267
Dy	2.19346	±	0.697548	1.12067	±	0.184097	1.28	±	1.46	59
Yb	5.74938	±	1.00555	3.90295	±	0.410944	3.79	±	3.66	166
Th	0.723144	±	0.188913	0.334593	±	0.0530398	1.13	±	1	7.33

## Sheet: Tab ST2
SIMS analysis ID	Age (Ma)	[Ti]-KL reduced (2 s.e.)						[Al] (± 2*intSE)			[P] (± 2*intSE)			[Sc] (± 2*intSE)			[Ti] -Nist610 reduced (± 2*intSE)			[Fe] (± 2*intSE)			[Sr] (± 2*intSE)			[Y] (± 2*intSE)			[Zr] (± 2*intSE)			[Nb] (± 2*intSE)			[La] (± 2*intSE)			[Ce] (± 2*intSE)			[Pr] (± 2*intSE)			[Sm] (± 2*intSE)			[Eu] (± 2*intSE)
4-1	4052	6.17	±	0.71				1.25	±	0.48	133.5	±	9.8	218	±	13	4.67	±	0.55	-	±	-	0.122	±	0.02	286	±	21	367000	±	23000	2.42	±	0.15	0.0022	±	0.0022	3.89	±	0.25	0.0083	±	0.0042	0.89	±	0.13	0.09	±	0.023
4-2	3999	4.2	±	1.4				-	±	-	156	±	21	255	±	27	3.1	±	0.94	-	±	-	0.167	±	0.033	509	±	77	389000	±	46000	3.04	±	0.32	0.0098	±	0.0044	6.8	±	0.96	0.0407	±	0.0087	2.4	±	0.38	0.209	±	0.068
4-5	4010	10.1	±	1.7				3.2	±	1.5	331	±	24	268	±	40	7.4	±	1.4	-	±	-	0.18	±	0.038	678	±	71	348000	±	42000	1.33	±	0.23	0.022	±	0.018	7.39	±	0.9	0.074	±	0.019	4.36	±	0.52	0.39	±	0.22
4-6	4096	4.26	±	0.84				0.78	±	0.44	144	±	11	248	±	20	2.96	±	0.7	0.25	±	0.17	0.195	±	0.036	870	±	130	385000	±	23000	1.91	±	0.24	0.0145	±	0.0069	6.17	±	0.55	0.181	±	0.028	6.8	±	1.2	1.32	±	0.25
4-7	4142	7.27	±	0.94				4.17	±	0.74	273	±	27	194	±	28	5	±	1	-	±	-	0.27	±	0.045	1220	±	130	311000	±	20000	4.42	±	0.77	0.0078	±	0.0095	6.72	±	0.74	0.037	±	0.024	5.12	±	0.73	0.45	±	0.12
4-8	3895	5.2	±	1.4				8.5	±	3.2	106.7	±	9.4	222	±	22	3.62	±	0.95	-	±	-	0.148	±	0.027	496	±	32	332000	±	26000	2.01	±	0.18	0.0078	±	0.0043	7.62	±	0.6	0.053	±	0.016	3	±	0.41	0.412	±	0.078
4-9	4085	6.45	±	0.92				5.3	±	1.2	235	±	15	231	±	24	4.69	±	0.69	0.33	±	0.1	0.272	±	0.034	1500	±	120	366000	±	28000	2.98	±	0.34	0.0176	±	0.0063	12.9	±	1.3	0.154	±	0.031	9.19	±	0.78	0.463	±	0.076
4-10	4063	5.48	±	0.88				-	±	-	231	±	17	260	±	26	4.02	±	0.64	-	±	-	0.177	±	0.034	734	±	67	388000	±	37000	4.38	±	0.36	0.0083	±	0.0041	11.26	±	0.92	0.062	±	0.014	3.88	±	0.38	0.254	±	0.049
4-12	3883	4.04	±	0.65				5.9	±	2	282	±	19	251	±	16	2.97	±	0.38	0.241	±	0.089	0.268	±	0.039	1230	±	100	369000	±	34000	10	±	0.55	0.035	±	0.012	19.7	±	1.6	0.068	±	0.012	6.02	±	0.59	0.799	±	0.093
4-13	3991	13.4	±	0.94				1.65	±	0.5	231	±	21	332	±	59	10.5	±	0.71	0.35	±	0.18	0.185	±	0.032	689	±	59	431000	±	48000	2.64	±	0.4	0.0208	±	0.0083	5.97	±	0.82	0.145	±	0.021	5.19	±	0.71	0.87	±	0.18
4-15	3717	4.95	±	0.66				-	±	-	227	±	20	250	±	36	3.14	±	0.82	-	±	-	0.182	±	0.054	659	±	54	371000	±	47000	4.58	±	0.46	0.0034	±	0.0027	5.92	±	0.66	0.038	±	0.014	2.76	±	0.44	0.159	±	0.044
5-2	3989	3.32	±	0.81				-	±	-	142.5	±	9.7	247	±	25	2.25	±	0.56	-	±	-	0.122	±	0.023	372	±	27	371000	±	21000	1.55	±	0.1	0.0043	±	0.0021	4.96	±	0.37	0.0387	±	0.009	2.64	±	0.28	0.422	±	0.049
5-3	4002	2.41	±	0.89				1	±	0.32	188	±	16	258	±	29	4.9	±	5.7	-	±	-	0.239	±	0.037	1140	±	150	412000	±	39000	1.97	±	0.19	0.0121	±	0.0073	9.5	±	1.1	0.163	±	0.033	8.7	±	1.5	0.92	±	0.15
5-4	3926	5.78	±	0.95				0.97	±	0.61	370	±	31	238	±	23	4.32	±	0.76	-	±	-	0.346	±	0.043	2240	±	210	404000	±	42000	3.88	±	0.31	0.0352	±	0.0082	9.8	±	1.1	0.411	±	0.053	13.5	±	1.2	0.727	±	0.097
5-5	3981	3.55	±	0.66				0.72	±	0.42	142	±	11	239	±	17	2.49	±	0.55	-	±	-	0.138	±	0.025	529	±	29	343000	±	21000	1.93	±	0.11	0.0045	±	0.0023	5.32	±	0.33	0.0343	±	0.0056	2.66	±	0.32	0.343	±	0.056
5-7	3800	3.39	±	0.63				-	±	-	230	±	17	230	±	18	2.34	±	0.43	-	±	-	0.165	±	0.024	660	±	65	361000	±	26000	3.56	±	0.25	0.0037	±	0.0028	13.05	±	0.93	0.0515	±	0.0099	3.45	±	0.41	0.303	±	0.056
5-8	3981	2.43	±	0.52				0.7	±	0.3	77.1	±	5.5	252	±	22	1.58	±	0.38	-	±	-	0.097	±	0.015	202	±	19	379000	±	29000	0.988	±	0.096	-	±	-	2.83	±	0.29	0.0114	±	0.0046	1.32	±	0.17	0.26	±	0.033
5-10	4113	5.9	±	1.4				1.64	±	0.61	129	±	15	227	±	41	4.32	±	0.86	-	±	-	0.117	±	0.028	295	±	43	403000	±	57000	2.11	±	0.32	0.0099	±	0.0071	5.89	±	0.7	0.031	±	0.011	1.32	±	0.23	0.261	±	0.071
5-11	3882	1.99	±	0.64				0.83	±	0.33	121.4	±	8.2	293	±	32	1.67	±	0.45	-	±	-	0.164	±	0.025	550	±	33	396000	±	28000	2.62	±	0.18	-	±	-	3.16	±	0.23	0.0213	±	0.0074	2.35	±	0.2	0.258	±	0.045
5-14	4093	11.5	±	3.5				7.3	±	1.1	43.5	±	4.5	236	±	22	7.3	±	1.5	-	±	-	0.063	±	0.016	45.3	±	3.4	393000	±	27000	0.475	±	0.045	-	±	-	4.05	±	0.32	0.025	±	0.01	0.512	±	0.078	0.279	±	0.055
5-15	4007	4.11	±	0.86				3.49	±	0.71	70.2	±	5.9	236	±	23	2.36	±	0.58	-	±	-	0.088	±	0.035	116	±	11	371000	±	36000	0.465	±	0.071	-	±	-	0.76	±	0.12	-	±	-	0.277	±	0.044	0.052	±	0.019
6-1	4046	3.22	±	0.56				3.4	±	1.1	174	±	18	220	±	34	2.51	±	0.62	0.21	±	0.13	0.146	±	0.038	470	±	76	387000	±	66000	13.2	±	1.5	0.59	±	0.15	8.6	±	1.3	0.49	±	0.19	2.77	±	0.38	0.363	±	0.082
6-2	4173	6.02	±	0.59				1.05	±	0.47	145	±	18	223	±	20	4.31	±	0.45	-	±	-	0.16	±	0.04	363	±	39	409000	±	33000	2.82	±	0.34	0.017	±	0.011	5.48	±	0.87	0.0229	±	0.0078	1.43	±	0.22	0.112	±	0.026
6-3	4080	6.45	±	0.84				1.07	±	0.32	80.4	±	7.7	243	±	22	4.17	±	0.71	-	±	-	0.104	±	0.028	196	±	20	394000	±	29000	0.923	±	0.091	-	±	-	2.35	±	0.21	0.026	±	0.014	1.16	±	0.19	0.198	±	0.047
6-5	3987	9.23	±	0.87				0.78	±	0.41	153	±	12	285	±	36	5.9	±	1	-	±	-	0.132	±	0.025	514	±	83	413000	±	45000	2.21	±	0.25	0.0069	±	0.005	7.22	±	0.63	0.095	±	0.025	3.9	±	0.67	0.56	±	0.11
6-6	3943	6.73	±	0.97				2.52	±	0.55	116.6	±	9.9	266	±	24	4.57	±	0.55	0.161	±	0.086	0.259	±	0.039	371	±	24	401000	±	27000	3.49	±	0.24	0.76	±	0.18	8.2	±	1.6	0.86	±	0.2	3.63	±	0.71	0.62	±	0.15
6-7	4108	6.1	±	1.8				1.05	±	0.66	168	±	13	277	±	68	4.8	±	1.4	-	±	-	0.223	±	0.085	700	±	100	434000	±	51000	6.4	±	1	0.0064	±	0.0062	7.2	±	1	0.023	±	0.012	2.83	±	0.67	0.36	±	0.13
6-8	4005	5.01	±	0.99				2.7	±	1.9	192	±	14	340	±	54	3.1	±	1.4	-	±	-	0.197	±	0.054	570	±	82	433000	±	73000	1.01	±	0.14	-	±	-	4.59	±	0.65	0.062	±	0.018	3.6	±	1.1	0.89	±	0.21
6-9	4003	12.8	±	1.5				-	±	-	255	±	23	227	±	19	8.6	±	1	-	±	-	0.144	±	0.023	601	±	57	347000	±	24000	1.01	±	0.11	0.0101	±	0.0043	7.5	±	0.59	0.081	±	0.012	3.75	±	0.4	0.441	±	0.064
6-10	4181	9.7	±	1.8				10.2	±	2.8	128	±	13	226	±	15	4.09	±	0.91	0.24	±	0.21	0.251	±	0.079	820	±	130	387000	±	41000	2.83	±	0.29	0.04	±	0.024	7.6	±	1.2	0.196	±	0.045	5.4	±	1	0.65	±	0.1
6-12	3853	2.9	±	2.2				2.6	±	1.8	102	±	19	350	±	120	2.2	±	1.5	-	±	-	0.206	±	0.059	710	±	170	534000	±	40000	2.81	±	0.26	-	±	-	3.54	±	0.38	0.017	±	0.01	3.12	±	0.75	0.39	±	0.13
6-13	4083	4.9	±	1.1				1.43	±	0.55	163	±	11	297	±	35	3.42	±	0.54	-	±	-	0.258	±	0.046	1450	±	190	403000	±	26000	1.85	±	0.16	0.031	±	0.0074	7.71	±	0.6	0.432	±	0.043	11.5	±	1	2.1	±	0.18
6-14	3999	4.59	±	0.95				5.1	±	4.3	74.2	±	4.9	249	±	17	3.18	±	0.6	0.172	±	0.089	0.155	±	0.025	301	±	15	379000	±	24000	1.29	±	0.11	0.034	±	0.012	1.66	±	0.15	0.03	±	0.013	1.43	±	0.2	0.307	±	0.04
7-1	3897	4.25	±	0.92				2.42	±	0.82	185	±	13	229	±	18	3.24	±	0.43	-	±	-	0.129	±	0.02	487	±	34	358000	±	25000	2.6	±	0.17	0.0077	±	0.0026	5.91	±	0.41	0.031	±	0.0091	2.35	±	0.23	0.233	±	0.036
7-3	3955	6.9	±	1.4				5	±	3	195	±	21	261	±	40	5.5	±	1.7	-	±	-	0.172	±	0.048	560	±	94	367000	±	55000	1.88	±	0.21	0.024	±	0.014	12.1	±	2.5	0.052	±	0.023	3.55	±	0.88	0.299	±	0.071
7-5	4014	5.5	±	0.59				3.4	±	1.2	190	±	31	234	±	29	4.18	±	0.81	-	±	-	0.179	±	0.05	570	±	81	363000	±	38000	3.62	±	0.57	0.02	±	0.014	11.8	±	1.2	0.045	±	0.018	2.96	±	0.5	0.265	±	0.063
7-7	3991	5.6	±	1.7				1.3	±	0.87	190	±	15	266	±	47	4.6	±	1.5	-	±	-	0.159	±	0.06	497	±	92	390000	±	54000	2.32	±	0.3	0.069	±	0.087	10.8	±	1.2	0.04	±	0.017	2.51	±	0.55	0.13	±	0.067
7-8	4032	8.1	±	1.9				2.8	±	1.8	103	±	21	241	±	46	5	±	1.7	0.8	±	1.15	0.197	±	0.069	257	±	46	460000	±	140000	1.97	±	0.2	0.0082	±	0.0074	4.78	±	0.45	0.021	±	0.019	0.82	±	0.18	0.103	±	0.067
7-9	4049	4.61	±	0.67				-	±	-	206	±	14	231	±	16	3.1	±	0.48	-	±	-	0.184	±	0.022	629	±	37	367000	±	26000	4.56	±	0.28	0.0075	±	0.0036	6.91	±	0.51	0.0242	±	0.0067	2.74	±	0.33	0.249	±	0.046
7-10	4127	5.9	±	1.2				-	±	-	88	±	13	215	±	27	3.24	±	0.89	-	±	-	0.117	±	0.019	433	±	52	377000	±	38000	0.369	±	0.059	0.0243	±	0.0092	2.95	±	0.35	0.145	±	0.027	2.78	±	0.65	0.72	±	0.16
7-12	3999	5.5	±	1.1				1.45	±	0.88	120	±	11	238	±	19	3.44	±	0.92	-	±	-	0.132	±	0.05	358	±	33	341000	±	36000	0.84	±	0.12	0.0113	±	0.0071	1.5	±	0.14	0.024	±	0.011	1.77	±	0.22	0.234	±	0.043
7-13	4038	3.45	±	0.68				-	±	-	167	±	20	241	±	36	2.17	±	0.7	-	±	-	0.157	±	0.068	490	±	71	412000	±	58000	3.36	±	0.41	0.022	±	0.029	6.13	±	0.38	0.0154	±	0.0075	1.43	±	0.5	0.203	±	0.079
8-2	4018	5.58	±	0.99				1.77	±	0.7	173	±	13	245	±	28	7.2	±	2.1	0.34	±	0.2	0.33	±	0.25	464	±	49	369000	±	30000	2.85	±	0.26	0.09	±	0.1	8.8	±	1.2	0.12	±	0.095	2.81	±	0.78	0.287	±	0.099
8-5	3980	3.68	±	0.68				2.7	±	1.4	190	±	18	239	±	18	2.39	±	0.58	-	±	-	0.167	±	0.022	704	±	59	346000	±	35000	3.55	±	0.34	0.0043	±	0.0031	8.06	±	0.61	0.052	±	0.017	4.17	±	0.4	0.431	±	0.064
8-7	3936	4.26	±	0.75				-	±	-	102.8	±	9.3	245	±	14	3.18	±	0.54	-	±	-	0.136	±	0.025	297	±	27	396000	±	36000	0.92	±	0.12	-	±	-	1.55	±	0.13	0.0178	±	0.0076	1.12	±	0.14	0.264	±	0.049
8-8	4043	5.41	±	0.67				1.74	±	0.85	300	±	26	219	±	16	3.45	±	0.73	0.28	±	0.16	0.211	±	0.037	920	±	130	343000	±	33000	5.64	±	0.67	0.0051	±	0.004	12.3	±	2	0.073	±	0.02	3.85	±	0.71	0.204	±	0.048
8-9	4042	1.77	±	0.6				-	±	-	58.7	±	5	235	±	25	1.37	±	0.38	-	±	-	0.087	±	0.017	134.5	±	8.3	398000	±	33000	0.9	±	0.081	0.0028	±	0.0022	1.104	±	0.055	-	±	-	0.305	±	0.072	0.075	±	0.023
8-10	4010	6.05	±	0.78				0.98	±	0.38	243	±	12	240	±	19	4.12	±	0.52	-	±	-	0.198	±	0.022	633	±	53	363000	±	36000	3.08	±	0.21	0.0045	±	0.0036	4.2	±	0.37	0.042	±	0.012	2.79	±	0.34	0.186	±	0.03
8-12	4006	6.18	±	0.88				2.21	±	0.66	202	±	23	194	±	26	4.5	±	0.84	0.21	±	0.12	0.245	±	0.055	604	±	47	354000	±	48000	6.99	±	0.53	0.457	±	0.072	8.4	±	1.1	0.361	±	0.096	2.8	±	0.21	0.333	±	0.086
8-14	3992	8.8	±	1				-	±	-	267	±	19	230	±	15	6.53	±	0.7	-	±	-	0.162	±	0.032	771	±	49	359000	±	28000	2.76	±	0.23	0.0054	±	0.0039	12.43	±	0.94	0.062	±	0.0079	4.44	±	0.38	0.252	±	0.037
8-15	4005	5.5	±	0.95				5.5	±	4.3	64.7	±	9.7	261	±	43	3.7	±	0.9	-	±	-	0.147	±	0.044	279	±	42	480000	±	100000	1.13	±	0.11	0.083	±	0.024	6.11	±	0.98	0.138	±	0.042	1.6	±	0.32	0.365	±	0.066
9-2	4026	5.39	±	0.79				0.53	±	0.75	163.4	±	9.1	223	±	18	3.78	±	0.55	-	±	-	0.175	±	0.027	575	±	44	375000	±	31000	7.13	±	0.42	0.0031	±	0.0025	5	±	0.36	0.0267	±	0.0068	2.32	±	0.27	0.215	±	0.04
9-3	3919	3.34	±	0.75				-	±	-	139.3	±	9.2	235	±	16	2.42	±	0.46	-	±	-	0.124	±	0.017	401	±	27	396000	±	26000	2.65	±	0.15	0.0078	±	0.0027	8.75	±	0.62	0.0613	±	0.009	1.64	±	0.12	0.109	±	0.019
9-4	4019	4.7	±	0.94				-	±	-	158	±	17	226	±	15	2.78	±	0.49	-	±	-	0.145	±	0.044	305	±	31	384000	±	43000	4.27	±	0.44	0.017	±	0.01	8.09	±	0.71	0.042	±	0.016	1.66	±	0.29	0.128	±	0.053
9-5	4031	5.42	±	0.59				2.53	±	0.45	479	±	27	308	±	18	4.03	±	0.51	0.152	±	0.071	0.382	±	0.078	1231	±	97	410000	±	31000	3.04	±	0.37	0.149	±	0.027	8.07	±	0.75	0.237	±	0.057	6.17	±	0.43	0.877	±	0.096
9-7	3757	4.42	±	0.61				1.01	±	0.38	245	±	16	251	±	17	3.19	±	0.42	-	±	-	0.143	±	0.021	527	±	52	386000	±	32000	4.7	±	0.29	0.0109	±	0.0042	6.77	±	0.56	0.0176	±	0.0055	1.73	±	0.16	0.103	±	0.024
9-8	4226	9.2	±	1.5				12.3	±	3.6	173	±	13	248	±	23	8.6	±	1.5	0.262	±	0.082	0.236	±	0.059	900	±	81	459000	±	73000	10.7	±	1.8	0.034	±	0.016	8.09	±	0.7	0.119	±	0.026	5.87	±	0.81	0.348	±	0.07
9-10	3990	4.89	±	0.6				-	±	-	195	±	16	244	±	16	3.45	±	0.4	-	±	-	0.123	±	0.017	466	±	43	374000	±	29000	2.41	±	0.21	0.0168	±	0.005	8.6	±	0.87	0.071	±	0.012	3.22	±	0.41	0.568	±	0.084
9-11	3972	4.84	±	0.8				1.12	±	0.29	163	±	12	233	±	21	3.57	±	0.63	-	±	-	0.254	±	0.028	1400	±	110	357000	±	23000	0.857	±	0.068	0.031	±	0.014	2.96	±	0.25	0.084	±	0.016	7.02	±	0.58	0.827	±	0.09
9-13	3936	5.92	±	0.84				6.7	±	3.2	374	±	33	257	±	21	4.22	±	0.65	-	±	-	0.258	±	0.029	1450	±	140	377000	±	28000	2.39	±	0.29	0.0093	±	0.0036	5.17	±	0.43	0.067	±	0.012	5.22	±	0.59	0.718	±	0.082
9-14	3939	5.1	±	1.1				1.2	±	0.65	117	±	15	270	±	60	3.7	±	0.92	-	±	-	0.143	±	0.046	463	±	65	467000	±	50000	2.38	±	0.36	0.0061	±	0.006	14.6	±	6.7	0.067	±	0.014	3.35	±	0.67	0.304	±	0.084
10-5	3948	1.97	±	0.57				2.93	±	0.94	143	±	26	317	±	85	1.01	±	0.81	-	±	-	0.17	±	0.045	660	±	130	391000	±	54000	1.82	±	0.37	0.035	±	0.017	2.82	±	0.38	0.036	±	0.024	2.3	±	0.4	0.43	±	0.14
10-6	3936	4.4	±	0.62				-	±	-	273	±	30	232	±	25	2.74	±	0.6	-	±	-	0.159	±	0.037	587	±	64	349000	±	51000	2.9	±	0.23	0.023	±	0.019	7.5	±	1.1	0.052	±	0.015	2.99	±	0.37	0.293	±	0.061
10-8	4041	6.07	±	0.67				2.25	±	0.67	200	±	21	225	±	23	4.47	±	0.49	-	±	-	0.163	±	0.029	546	±	58	387000	±	48000	4.35	±	0.31	0.0162	±	0.0074	5.96	±	0.6	0.034	±	0.019	2.07	±	0.23	0.148	±	0.023
10-10	3992	2.82	±	0.46				-	±	-	91	±	11	203	±	13	1.83	±	0.34	-	±	-	0.099	±	0.023	378	±	34	363000	±	20000	0.65	±	0.15	0.017	±	0.011	2.04	±	0.18	0.0074	±	0.006	1.06	±	0.19	0.118	±	0.048
10-11	3825	2.8	±	1				0.81	±	0.6	119.9	±	9.3	249	±	22	2.14	±	0.7	-	±	-	0.134	±	0.022	303	±	32	389000	±	46000	0.93	±	0.11	0.003	±	0.0026	2.1	±	0.27	0.0166	±	0.0089	1.27	±	0.22	0.256	±	0.063
10-12	4027	3.96	±	0.51				2.33	±	0.55	140	±	13	235	±	17	3.09	±	0.35	-	±	-	0.122	±	0.028	494	±	47	369000	±	20000	2.25	±	0.2	0.069	±	0.022	8.8	±	0.67	0.073	±	0.015	3.04	±	0.38	0.376	±	0.055
10-14	3964	3.97	±	0.54				1.56	±	0.35	225	±	21	234	±	22	2.76	±	0.46	0.16	±	0.13	0.166	±	0.031	508	±	55	376000	±	34000	2.71	±	0.32	0.021	±	0.011	10	±	1.2	0.0484	±	0.0096	2.32	±	0.3	0.199	±	0.029
10-15	3964	8.9	±	2				1.09	±	0.41	110	±	13	249	±	38	6.4	±	1.7	0.39	±	0.12	0.276	±	0.069	1480	±	180	417000	±	79000	0.71	±	0.1	0.0229	±	0.0098	1.47	±	0.19	0.176	±	0.042	9.8	±	1.1	1.99	±	0.29
																	-
Rejects - nist610 reduced
Sample ID	Age (Ma)	[Ti]-KL reduced (2 s.e.)						[Al] (± 2*intSE)			[P] (± 2*intSE)			[Sc] (± 2*intSE)			[Ti] -Nist610 reduced (± 2*intSE)			[Fe] (± 2*intSE)			[Sr] (± 2*intSE)			[Y] (± 2*intSE)			[Zr] (± 2*intSE)			[Nb] (± 2*intSE)			[La] (± 2*intSE)			[Ce] (± 2*intSE)			[Pr] (± 2*intSE)			[Sm] (± 2*intSE)			[Eu] (± 2*intSE)
4-4	4129	11.8	±	1.8				10.6	±	2.1	165	±	61	242	±	42	8.4	±	1.9	-	±	-	0.47	±	0.14	1590	±	490	450000	±	130000	8.8	±	1.5	0.55	±	0.35	18.2	±	5.9	0.76	±	0.51	8.4	±	2.5	1.21	±	0.49
4-11	3732	2.77	±	0.46				4.16	±	0.55	741	±	56	274	±	28	2.01	±	0.41	-	±	-	0.356	±	0.05	1440	±	110	369000	±	27000	6.58	±	0.48	0.0026	±	0.0029	5.21	±	0.41	0.0257	±	0.0068	3.53	±	0.43	0.099	±	0.018
4-14	4050	1.17	±	0.6				1.81	±	0.42	25.7	±	4.4	257	±	56	-	±	-	-	±	-	0.083	±	0.05	53	±	11	435000	±	46000	1.31	±	0.22	-	±	-	0.443	±	0.059	-	±	-	0.092	±	0.066	0.058	±	0.05
5-6	3938	12.2	±	2.5				20	±	6.1	291	±	25	238	±	18	8.5	±	1.4	1.07	±	0.16	0.385	±	0.037	1420	±	140	365000	±	32000	4.43	±	0.3	0.0262	±	0.0068	14.2	±	1.4	0.108	±	0.021	7	±	0.96	0.291	±	0.042
5-12	4034	47	±	17				180	±	90	400	±	33	225	±	20	29	±	11	34	±	15	2.58	±	0.38	2030	±	160	387000	±	29000	7.32	±	0.74	27.5	±	7.1	122	±	28	11.1	±	2.8	33.9	±	6.9	6	±	1.5
5-13	3989	10.1	±	1.3				1.67	±	0.55	396	±	30	261	±	27	7.18	±	0.85	-	±		0.233	±	0.038	1127	±	92	405000	±	31000	3.42	±	0.22	0.057	±	0.049	17	±	1.2	0.133	±	0.024	6.45	±	0.69	0.328	±	0.052
6-15	3902	8.79	±	0.99				25	±	0.31	183	±	33	250	±	17	6.27	±	0.35	0.83	±		0.246	±	0.055	525	±	98	447000	±	21000	8.8	±	0.42	0.172	±	0.0026	9.2	±	0.38	0.225	±	0.0093	2.46	±	0.33	0.233	±	0.072
7-2	3449	68	±	53				550	±	230	323	±	28	205	±	49	57	±	11	5.8	±	4.1	2.13	±	0.5	810	±	170	294000	±	75000	3.17	±	0.72	31.2	±	9.5	93	±	26	8.8	±	3.1	16.7	±	2.6	3.9	±	1.1
7-4	4063	-	±	-				770	±	600	249	±	28	329	±	41	8.8	±	2.3	4.5	±	5.3	0.42	±	0.13	920	±	130	418000	±	50000	1.84	±	0.45	2.21	±	0.37	18.4	±	4	1.42	±	0.52	7.5	±	1.1	1.63	±	0.39
7-14	3924	9.3	±	1.8				420	±	820	66	±	13	280	±	100	5.5	±	2.1	0.27	±	0.11	0.205	±	0.066	630	±	170	363000	±	71000	3.3	±	0.64	0.022	±	0.012	3.35	±	0.87	0.038	±	0.017	1.67	±	0.69	0.28	±	0.12
8-3	3963	22.2	±	3.8				5.3	±	1.2	462	±	37	294	±	31	14.9	±	3.7	0.26	±	0.14	0.283	±	0.042	909	±	87	355000	±	44000	3.82	±	0.35	0.198	±	0.033	27.2	±	1.8	0.354	±	0.082	5.7	±	0.52	0.94	±	0.1
8-4	3741	17.8	±	7.3				3.6	±	1	700	±	120	450	±	94	9	±	1.3	0.57	±	0.1	0.324	±	0.048	1440	±	310	395000	±	76000	2.67	±	0.28	0.245	±	0.084	7.3	±	1.1	0.219	±	0.094	5.66	±	0.77	0.88	±	0.1
8-13	4003	16	±	1.7				3.58	±	0.94	226	±	11	224	±	16	170	±	330	1.06	±	0.31	0.354	±	0.032	1480	±	120	339000	±	34000	1.6	±	0.15	0.45	±	0.11	11.9	±	1.3	0.402	±	0.054	8.5	±	1	0.83	±	0.12
9-6	4083	7.8	±	1.8				14	±	8.3	126	±	13	241	±	31	6.9	±	2.3	2.4	±	2.6	0.246	±	0.058	523	±	82	385000	±	66000	1.68	±	0.15	5.5	±	3.4	16.1	±	3.8	1.07	±	0.53	3.37	±	0.22	0.433	±	0.043
10-13	4027	66	±	12				107	±	64	69	±	11	227	±	33	17.9	±	4.3	5.4	±	8.4	0.36	±	0.18	175	±	48	404000	±	63000	1.78	±	0.33	3.4	±	1.8	11.1	±	5.8	1.05	±	0.61	2.9	±	1.5	0.58	±	0.28
Values that caused the analyses to be rejected
[truncated: 67 more columns]

## Sheet: Tab st3
	SIMS analysis ID	207Pb/206Pb Age (Ma) (± 2 s.e.)			Concordance (%)	30/28 Si	1 s.e. (%)	18/16 O	1 s.e. (%)	δ30Si (2 s.e.)			δ18O (2 s.e.)						30/28 Si	1 s.e. (%)	18/16 O	1 s.e. (%)
KIM-M3@8						0.0331125	0.0109228	0.00201586	0.0067807										0.0331125	0.0109228	0.00201586	0.0067807
KIM-M3@9						0.0331138	0.0107612	0.00201552	0.00577304										0.0331138	0.0107612	0.00201552	0.00577304
KIM-M3@7c						0.0331013	0.0097991	0.00201554	0.00645745										0.0331013	0.0097991	0.00201554	0.00645745
KIM-M3@8b						0.033097	0.00727122	0.00201539	0.00606184										0.033097	0.00727122	0.00201539	0.00606184
KIM-M3@9b						0.0331009	0.0117799	0.00201598	0.0080776										0.0331009	0.0117799	0.00201598	0.0080776
JH_Loose4_26_06	7-8b@1	4032	±	32	97.5414	0.0330958	0.00692809	0.0020184	0.00562369	-0.506666	±	0.138562	6.60671	±	0.112474				0.0330958	0.00692809	0.0020184	0.00562369
JH_Loose4_26_08	7-7@1	3991	±	32	101.687	0.0331103	0.00602962	0.00201901	0.00660387	-0.057445	±	0.120592	6.90584	±	0.132077				0.0331053	0.0110686	0.00201749	0.00748836
JH_Loose4_26_08	7-7@2	3991	±	32	101.687	0.0331141	0.00571114	0.00201895	0.00675665	0.063089	±	0.114223	6.87756	±	0.135133				0.0331103	0.00602962	0.00201901	0.00660387
JH_Loose4_28_02	7-5@1	4014	±	34	98.9269	0.0331016	0.0120991	0.00201832	0.00707797	-0.306127	±	0.241982	6.56355	±	0.141559				0.0331141	0.00571114	0.00201895	0.00675665
KIM-M3@10						0.0331081	0.0119829	0.00201633	0.00628764										0.0331017	0.00984613	0.002018	0.00870631
KIM-M3@11						0.0331093	0.00870912	0.00201575	0.00522855										0.0331016	0.0120991	0.00201832	0.00707797
KIM-M3@12						0.0331038	0.006473	0.00201617	0.00601333										0.0331081	0.0119829	0.00201633	0.00628764
JH_Loose4_28_02	7-5@2	4014	±	34	98.9269	0.0331006	0.0058247	0.00201867	0.00833501	-0.314337	±	0.116494	6.69667	±	0.1667				0.0331093	0.00870912	0.00201575	0.00522855
JH_Loose4_28_09	7-4@1	4063	±	34	90.1736	0.0330883	0.00981054	0.00201974	0.00578781	-0.680532	±	0.196211	7.22992	±	0.115756				0.0331038	0.006473	0.00201617	0.00601333
JH_Loose4_28_10	7-3@1	3955	±	35	101.103	0.0330985	0.00825293	0.00201943	0.00595128	-0.36784	±	0.165059	7.07416	±	0.119026				0.0331006	0.0058247	0.00201867	0.00833501
JH_Loose4_28_10	7-3@2	3955	±	35	102.103	0.033104	0.00882239	0.00201925	0.00672069	-0.197752	±	0.176448	6.98487	±	0.134414				0.0330883	0.00981054	0.00201974	0.00578781
JH_Loose4_28_10	7-3@3	3955	±	35	103.103	0.0331001	0.00829741	0.00201955	0.00843566	-0.311065	±	0.165948	7.1327	±	0.168713				0.0330985	0.00825293	0.00201943	0.00595128
JH_Loose4_31_06	7-2@1	3449	±	31	91.0557	0.0330956	0.00883033	0.00201755	0.00634924	-0.440695	±	0.176607	6.14061	±	0.126985				0.033104	0.00882239	0.00201925	0.00672069
KIM-M3@13						0.0331013	0.00926826	0.00201541	0.00929103										0.0331001	0.00829741	0.00201955	0.00843566
KIM-M3@14						0.0331051	0.00629313	0.00201609	0.00844922										0.0330956	0.00883033	0.00201755	0.00634924
KIM-M3@15						0.0330958	0.00901	0.00201599	0.00756883										0.0331013	0.00926826	0.00201541	0.00929103
JH_Loose4_32_06	7-1@1	3897	±	38	99.6932	0.0331043	0.00752657	0.00201834	0.00729455	-0.156131	±	0.150531	6.58637	±	0.145891				0.0331051	0.00629313	0.00201609	0.00844922
JH_Loose4_21_10	6-1@1	4046	±	52	99.827	0.0330914	0.00533647	0.00201925	0.00553091	-0.536557	±	0.106729	7.0373	±	0.110618				0.0330958	0.00901	0.00201599	0.00756883
KIM-M3@16						0.0330946	0.0124058	0.00201616	0.00679697										0.0331043	0.00752657	0.00201834	0.00729455
KIM-M3@17						0.0331074	0.0106511	0.00201589	0.00512635										0.033098	0.0103113	0.0020159	0.00957599
KIM-M3@18						0.0330941	0.00997377	0.00201554	0.00643573										0.0330914	0.00533647	0.00201925	0.00553091
JH_Loose4_19_05	6-2@3	4173	±	52	100.192	0.0331029	0.00606806	0.00201703	0.0067211	-0.164073	±	0.121361	5.93247	±	0.134422				0.0331199	0.00804327	0.00201927	0.00585056
JH_Loose4_19_02	6-3@1	4080	±	54	100.171	0.0331034	0.00683349	0.00202001	0.00676891	-0.142632	±	0.13667	7.40926	±	0.135378				0.0330946	0.0124058	0.00201616	0.00679697
JH_Loose4_15_06	6-5@1	3987	±	52	99.6505	0.0330977	0.0110003	0.00201936	0.0086183	-0.300094	±	0.220006	7.0888	±	0.172366				0.0331074	0.0106511	0.00201589	0.00512635
JH_Loose4_15_06	6-5@2	3987	±	52	99.6505	0.0331053	0.0108845	0.00201917	0.00707733	-0.066234	±	0.21769	6.99405	±	0.141547				0.0330941	0.00997377	0.00201554	0.00643573
KIM-M3@19						0.0330888	0.0109543	0.0020159	0.00656516										0.0331029	0.00606806	0.00201703	0.0067211
KIM-M3@20						0.0330889	0.00705741	0.0020156	0.00585938										0.0331034	0.00683349	0.00202001	0.00676891
KIM-M3@21						0.0330899	0.0106281	0.00201604	0.0073391										0.0330959	0.00838033	0.00201998	0.00884876
JH_Loose4_15_05	6-6@1	3943	±	56	102.423	0.033086	0.00691314	0.00201803	0.00625309	-0.629824	±	0.138263	6.44277	±	0.125062				0.0330944	0.00980761	0.00201775	0.00713656
JH_Loose4_13_10	6-7@1	4108	±	51	99.8542	0.0330914	0.00711323	0.00201753	0.00912894	-0.456105	±	0.142265	6.19622	±	0.182579				0.0330977	0.0110003	0.00201936	0.0086183
JH_Loose4_13_03	6-8@1	4005	±	41	99.8264	0.0330886	0.00681849	0.00201838	0.00728703	-0.530769	±	0.13637	6.61937	±	0.145741				0.0331053	0.0108845	0.00201917	0.00707733
KIM-M3@22						0.0330853	0.0102455	0.0020156	0.00639529										0.0330888	0.0109543	0.0020159	0.00656516
KIM-M3@23						0.033092	0.00888277	0.00201626	0.00788759										0.0330889	0.00705741	0.0020156	0.00585938
KIM-M3@24						0.0330825	0.00888817	0.00201553	0.00692452										0.0330899	0.0106281	0.00201604	0.0073391
JH_Loose4_13_02	6-9b@1	4003	±	42	99.6269	0.0330988	0.00985608	0.00201842	0.00538098	-0.196627	±	0.197122	6.65818	±	0.10762				0.033086	0.00691314	0.00201803	0.00625309
JH_Loose4_12_06	6-10@1	4181	±	39	97.7911	0.0330953	0.0106148	0.00201665	0.00591547	-0.295151	±	0.212296	5.78209	±	0.118309				0.0330955	0.010086	0.0020183	0.00763994
JH_Loose4_12_06	6-10@2	4181	±	39	97.7911	0.0330904	0.00803984	0.00201673	0.00490066	-0.439911	±	0.160797	5.82178	±	0.0980133				0.0330914	0.00711323	0.00201753	0.00912894
JH_Loose4_25_08	7-10@1	4127	±	25	99.9516	0.033091	0.00780238	0.00201755	0.00651274	-0.415145	±	0.156048	6.22857	±	0.130255				0.033099	0.00929209	0.0020182	0.00544118
JH_Loose4_26_04	7-9@1	4049	±	40	95.7698	0.0330854	0.00955513	0.00201865	0.00802543	-0.575031	±	0.191103	6.77376	±	0.160509				0.0330886	0.00681849	0.00201838	0.00728703
KIM-M3@25						0.0330856	0.00855323	0.00201574	0.00495046										0.0330978	0.00924277	0.00201855	0.00820268
KIM-M3@26						0.0330885	0.00633477	0.00201566	0.00659178										0.0330853	0.0102455	0.0020156	0.00639529
KIM-M3@27						0.0330888	0.00659547	0.00201591	0.00575606										0.033092	0.00888277	0.00201626	0.00788759
JH_Loose4_12_01	6-10@3	3918	±	37	97.7911	0.0330947	0.00740542	0.00201787	0.00776439	-0.273195	±	0.148108	6.48284	±	0.155288				0.0330825	0.00888817	0.00201553	0.00692452
JH_Loose4_25_07	7-10@3	4241	±	23	97.7911	0.0330786	0.00764467	0.00201717	0.00529185	-0.748881	±	0.152893	6.13505	±	0.105837				0.0330988	0.00985608	0.00201842	0.00538098
JH_Loose4_25_07	7-10@4	4241	±	23	99.9516	0.0330927	0.00766025	0.0020165	0.00772851	-0.319168	±	0.153205	5.80462	±	0.15457				0.0330953	0.0106148	0.00201665	0.00591547
KIM-M3@28						0.0330958	0.00726159	0.00201524	0.00736976										0.0330904	0.00803984	0.00201673	0.00490066
KIM-M3@29						0.0330904	0.00939922	0.002015	0.00547469										0.033091	0.00780238	0.00201755	0.00651274
KIM-M3@30						0.0330992	0.0099384	0.00201595	0.00578244										0.0330772	0.0103077	0.00201696	0.00724866
JH_Loose4_24_07	7-12@1	3999	±	21	99.9516	0.0331035	0.00859036	0.00201823	0.00609151	0.0283172	±	0.171807	6.74011	±	0.12183				0.0330854	0.00955513	0.00201865	0.00802543
JH_Loose4_24_01	7-13@1	4038	±	25	100.05	0.0330788	0.00959084	0.00201726	0.0064945	-0.706376	±	0.191817	6.25932	±	0.12989				0.0330856	0.00855323	0.00201574	0.00495046
JH_Loose4_23_02	7-14b@1	3924	±	24	100.569	0.0330803	0.0081776	0.0020177	0.0055164	-0.655922	±	0.163552	6.48061	±	0.110328				0.0330885	0.00633477	0.00201566	0.00659178
KIM-M4@1						0.0330902	0.0104151	0.00201557	0.00605595										0.0330888	0.00659547	0.00201591	0.00575606
KIM-M4@2						0.0330802	0.00873747	0.00201512	0.00479045										0.0330947	0.00740542	0.00201787	0.00776439
KIM-M4@3						0.0330896	0.00846091	0.00201567	0.00808475										0.0330942	0.0086266	0.00201806	0.00593777
JH_Loose4_08_09 204 spikes	6-15@1	3902	±	39	99.9499	0.0330855	0.00844295	0.00201765	0.00706519	-0.468634	±	0.168859	6.5073	±	0.141304				0.0330786	0.00764467	0.00201717	0.00529185
JH_Loose4_09_07	6-14@1	3999	±	25	97.9403	0.0330925	0.0109538	0.00201792	0.00876223	-0.253466	±	0.219076	6.64028	±	0.175245				0.0330927	0.00766025	0.0020165	0.00772851
JH_Loose4_09_07	6-14@2	3999	±	25	95.9256	0.0330744	0.00956091	0.00201771	0.00615833	-0.792948	±	0.191218	6.53658	±	0.123167				0.0330958	0.00726159	0.00201524	0.00736976
JH_Loose4_10_08	6-13@1	4083	±	30	95.9256	0.0330813	0.00533374	0.00201856	0.00698906	-0.581708	±	0.106675	6.96033	±	0.139781				0.0330904	0.00939922	0.002015	0.00547469
JH_Loose4_10_08	6-13@2	4083	±	30	98.6483	0.0330983	0.00911656	0.00201837	0.00577341	-0.0624975	±	0.182331	6.86407	±	0.115468				0.0330992	0.0099384	0.00201595	0.00578244
JH_Loose4_11_03	6-12@1	3853	±	42	98.6483	0.033088	0.0086539	0.00201901	0.00562845	-0.368062	±	0.173078	7.18462	±	0.112569				0.0331035	0.00859036	0.00201823	0.00609151
KIM-M4@4						0.0330786	0.00674141	0.00201515	0.00755394										0.033099	0.00774808	0.00201836	0.00869364
KIM-M4@5						0.0330946	0.00800048	0.0020154	0.00678589										0.0330788	0.00959084	0.00201726	0.0064945
KIM-M4@6						0.0330859	0.00910434	0.00201499	0.00668929										0.0330803	0.0081776	0.0020177	0.0055164
JH_Loose3_44_08	5-15@1	4007	±	40	101.149	0.0330819	0.0101434	0.00201742	0.00688579	-0.532228	±	0.202867	6.43134	±	0.137716				0.0330874	0.00930709	0.00201814	0.00680094
JH_Loose3_44_08	5-15@2	4007	±	40	100.074	0.0330925	0.00829519	0.00201764	0.00563449	-0.207943	±	0.165904	6.54051	±	0.11269				0.0330952	0.00851667	0.00201848	0.00588522
JH_Loose3_44_08	5-15@3	4007	±	40	100.074	0.0330891	0.00672186	0.00201763	0.00695599	-0.302858	±	0.134437	6.53307	±	0.13912				0.0330902	0.0104151	0.00201557	0.00605595
JH_Loose3_46_08	5-14@1	4093	±	45	100.074	0.0330909	0.00579612	0.00201727	0.00912447	-0.245748	±	0.115922	6.35492	±	0.182489				0.0330802	0.00873747	0.00201512	0.00479045
JH_Loose3_46_08	5-14@2	4093	±	45	100.292	0.0330736	0.00926544	0.00201727	0.0055757	-0.763801	±	0.185309	6.3574	±	0.111514				0.0330896	0.00846091	0.00201567	0.00808475
JH_Loose3_46_08	5-14@3	4093	±	45	100.292	0.0330956	0.0100107	0.00201734	0.00738968	-0.0919326	±	0.200214	6.38867	±	0.147794				0.0330855	0.00844295	0.00201765	0.00706519
KIM-M4@7						0.0330923	0.00822361	0.00201534	0.00661828										0.0330925	0.0109538	0.00201792	0.00876223
KIM-M4@8						0.0330887	0.00959357	0.00201515	0.00660705										0.0330744	0.00956091	0.00201771	0.00615833
KIM-M4@9						0.0330863	0.00960793	0.00201543	0.0073661										0.0330813	0.00533374	0.00201856	0.00698906
JH_Loose4_02_03	5-13@2	3989	±	30	102.893	0.0330642	0.0138799	0.00201708	0.008168	-1.01627	±	0.277598	6.18342	±	0.16336				0.0330983	0.00911656	0.00201837	0.00577341
JH_Loose4_02_03	5-13@3	3989	±	30	102.893	0.0330941	0.0074454	0.00201781	0.00705538	-0.106814	±	0.148908	6.54464	±	0.141108				0.033088	0.0086539	0.00201901	0.00562845
JH_Loose4_03_01	5-12@1	4034	±	42	102.893	0.0330832	0.00772428	0.00201557	0.00569057	-0.430237	±	0.154486	5.43567	±	0.113811				0.0330786	0.00674141	0.00201515	0.00755394
JH_Loose4_03_02	5-11@1	3882	±	46	96.0804	0.0330816	0.00956357	0.00201885	0.00675855	-0.473171	±	0.191271	7.06116	±	0.135171				0.0330946	0.00800048	0.0020154	0.00678589
JH_Loose4_03_02	5-11@2	3882	±	46	100.437	0.033089	0.0109806	0.00201833	0.00677584	-0.24619	±	0.219611	6.80662	±	0.135517				0.0330859	0.00910434	0.00201499	0.00668929
KIM-M3@31						0.0330913	0.00899627	0.00201526	0.00672911										0.0330819	0.0101434	0.00201742	0.00688579
KIM-M3@32						0.033074	0.0113229	0.00201552	0.00595624										0.0330925	0.00829519	0.00201764	0.00563449
KIM-M3@33						0.0330788	0.0066644	0.00201568	0.00656862										0.0330891	0.00672186	0.00201763	0.00695599
JH_Loose4_03_08	5-10@2	4113	±	48	97.6167	0.0330761	0.00635851	0.00201626	0.00749191	-0.60897	±	0.12717	5.71475	±	0.149838				0.0330909	0.00579612	0.00201727	0.00912447
JH_Loose4_05_06	5-8@1	3981	±	50	96.0809	0.033078	0.00721628	0.00201891	0.00681643	-0.541896	±	0.144326	7.03004	±	0.136328				0.0330736	0.00926544	0.00201727	0.0055757
JH_Loose4_05_06	5-8@2	3981	±	50	100.549	0.0330781	0.01053	0.00201851	0.00517314	-0.533144	±	0.210601	6.83357	±	0.103463				0.0330956	0.0100107	0.00201734	0.00738968
JH_Loose4_06_03	5-7@1	3800	±	56	100.549	0.0330798	0.0134045	0.00201796	0.00746263	-0.478448	±	0.268091	6.5587	±	0.149253				0.0330923	0.00822361	0.00201534	0.00661828
KIM-M3@34						0.0330873	0.00984864	0.00201552	0.00711303										0.0330887	0.00959357	0.00201515	0.00660705
KIM-M3@35						0.0330739	0.00686444	0.00201554	0.00500631										0.0330863	0.00960793	0.00201543	0.0073661
KIM-M3@36						0.0330838	0.00979856	0.00201563	0.00622011										0.0330842	0.0102077	0.00201821	0.00535284
JH_Loose4_06_03	5-7@2	3800	±	56	98.8372	0.0330812	0.0116623	0.00201772	0.00665484	-0.415932	±	0.233245	6.46628	±	0.133097				0.0330642	0.0138799	0.00201708	0.008168
JH_Loose4_06_04	5-6@1	3938	±	56	98.8372	0.0330924	0.00866567	0.00201718	0.00732056	-0.0710472	±	0.173313	6.19637	±	0.146411				0.0330941	0.0074454	0.00201781	0.00705538
JH_Loose4_06_05	5-5@1	3981	±	47	100.73	0.0330712	0.00962588	0.00201848	0.00762812	-0.707356	±	0.192518	6.84039	±	0.152562				0.0330832	0.00772428	0.00201557	0.00569057
JH_Loose4_06_05	5-5@2	3981	±	47	99.5986	0.0330753	0.00820341	0.00201847	0.00724505	-0.577089	±	0.164068	6.83741	±	0.144901				0.0330816	0.00956357	0.00201885	0.00675855
JH_Loose4_06_06	5-4@1	3926	±	62	99.5986	0.033088	0.00917955	0.00201827	0.00492624	-0.183544	±	0.183591	6.73619	±	0.0985247				0.033089	0.0109806	0.00201833	0.00677584
KIM-W1@1						0.033101	0.00926849	0.00201656	0.00655091										0.0330913	0.00899627	0.00201526	0.00672911
KIM-W1@2						0.0330825	0.00927711	0.00201682	0.00527812										0.033074	0.0113229	0.00201552	0.00595624
KIM-W1@3						0.0330859	0.00717182	0.00201629	0.0076742										0.0330788	0.0066644	0.00201568	0.00656862
JH_Loose4_06_07	5-3@1	4002	±	57	99.0783	0.0330931	0.0107404	0.00201808	0.00772735	-0.00917217	±	0.214808	6.64242	±	0.154547				0.0330719	0.0108172	0.00201709	0.00670477
JH_Loose4_07_02	5-2@1	3989	±	57	99.7999	0.0330786	0.00936035	0.00201762	0.00482985	-0.435731	±	0.187207	6.41567	±	0.096597				0.0330761	0.00635851	0.00201626	0.00749191
JH_Loose4_07_02	5-2@2	3989	±	57	97.3811	0.0330794	0.00788191	0.00201713	0.00767004	-0.407329	±	0.157638	6.17106	±	0.153401				0.0330848	0.00750529	0.002017	0.00570111
JH_Loose4_07_02	5-2@3	3989	±	57	97.3811	0.0330806	0.00709554	0.0020178	0.00606948	-0.366532	±	0.141911	6.50448	±	0.12139				0.033078	0.00721628	0.00201891	0.00681643
KIM-W1@4						0.033079	0.00907253	0.00201624	0.00855805										0.0330781	0.01053	0.00201851	0.00517314
KIM-W1@5						0.0330784	0.0078047	0.00201606	0.00489768										0.0330798	0.0134045	0.00201796	0.00746263
KIM-W1@6						0.0330723	0.00657312	0.00201606	0.00524751										0.0330873	0.00984864	0.00201552	0.00711303
JH_Loose3_43_01	4-1@1	4052	±	61	99.9245	0.033092	0.00634235	0.00201682	0.00576282	0.00342119	±	0.126847	6.01775	±	0.115256				0.0330739	0.00686444	0.00201554	0.00500631
JH_Loose3_43_01	4-1@2	4052	±	61	102.292	0.0330841	0.0110204	0.00201681	0.00634866	-0.228761	±	0.220408	6.0113	±	0.126973				0.0330838	0.00979856	0.00201563	0.00622011
JH_Loose3_43_01	4-1@3	4052	±	61	102.292	0.0330891	0.0103122	0.0020164	0.00688302	-0.0745969	±	0.206243	5.80887	±	0.13766				0.0330812	0.0116623	0.00201772	0.00665484
JH_Loose3_43_01	4-1@4	4052	±	61	102.292	0.0330696	0.00815335	0.00201655	0.0077536	-0.657762	±	0.163067	5.88279	±	0.155072				0.0330924	0.00866567	0.00201718	0.00732056
JH_Loose3_42_05	4-2@1	3999	±	54	102.292	0.033086	0.00976568	0.00201782	0.00893785	-0.156849	±	0.195314	6.51639	±	0.178757				0.0330712	0.00962588	0.00201848	0.00762812
JH_Loose3_42_05	4-2@2	3999	±	54	100.428	0.0330817	0.0102494	0.00201817	0.00740429	-0.281716	±	0.204987	6.68558	±	0.148086				0.0330753	0.00820341	0.00201847	0.00724505
KIM-W1@7						0.0330836	0.0114329	0.00201594	0.00465136										0.0330769	0.00856083	0.0020182	0.00604583
KIM-W1@8						0.0330722	0.00932351	0.00201635	0.00481256										0.033088	0.00917955	0.00201827	0.00492624
KIM-W1@9						0.0330816	0.0121394	0.0020164	0.00808232										0.033101	0.00926849	0.00201656	0.00655091
JH_Loose3_38_05	4-4@1	4129	±	47	98.0054	0.0330715	0.0116684	0.00201739	0.00848127	-0.564147	±	0.233369	6.30205	±	0.169625				0.0330825	0.00927711	0.00201682	0.00527812
JH_Loose3_35_04	4-5@2	4010	±	53	97.6233	0.0330866	0.00927855	0.00201926	0.00677092	-0.0967847	±	0.185571	7.22938	±	0.135418				0.0330859	0.00717182	0.00201629	0.0076742
JH_Loose3_34_03	4-6@1	4096	±	42	97.6233	0.0330776	0.00685231	0.00201768	0.00691768	-0.364958	±	0.137046	6.44594	±	0.138354				0.0330931	0.0107404	0.00201808	0.00772735
JH_Loose3_34_03	4-6@2	4096	±	42	98.2992	0.0330719	0.00827728	0.002018	0.00608135	-0.530646	±	0.165546	6.60372	±	0.121627				0.0330816	0.00825004	0.00201796	0.00544792
KIM-M3@37						0.0330753	0.0074601	0.00201526	0.00765116										0.0330786	0.00936035	0.00201762	0.00482985
KIM-M3@38						0.0330719	0.00943745	0.00201572	0.00694165										0.0330794	0.00788191	0.00201713	0.00767004
KIM-M3@39						0.0330735	0.00879242	0.00201516	0.00619181										0.0330806	0.00709554	0.0020178	0.00606948
JH_Loose3_34_01	4-7@1	4142	±	48	98.2992	0.033071	0.008343	0.00201777	0.00739878	-0.537958	±	0.16686	6.5146	±	0.147976				0.0330773	0.0078773	0.00201829	0.00849213
JH_Loose3_33_03	4-8@1	3895	±	42	99.0029	0.0330851	0.00892543	0.00201787	0.00795082	-0.102625	±	0.178509	6.5672	±	0.159016				0.033079	0.00907253	0.00201624	0.00855805
JH_Loose3_33_02	4-9@1	4085	±	46	99.0921	0.0330789	0.0105198	0.00201752	0.00644951	-0.28555	±	0.210397	6.39304	±	0.12899				0.0330784	0.0078047	0.00201606	0.00489768
JH_Loose3_32_02	4-10@1	4063	±	38	99.0638	0.0330854	0.00803798	0.00201812	0.00676454	-0.0829965	±	0.16076	6.68926	±	0.135291				0.0330723	0.00657312	0.00201606	0.00524751
JH_Loose3_32_02	4-10@2	4063	±	38	99.4325	0.033068	0.00872376	0.00201842	0.00601747	-0.603032	±	0.174475	6.83712	±	0.120349				0.033092	0.00634235	0.00201682	0.00576282
KIM-M3@40						0.0330728	0.00927295	0.00201541	0.00743656										0.0330841	0.0110204	0.00201681	0.00634866
KIM-M3@41						0.0330711	0.00754865	0.00201534	0.006761										0.0330891	0.0103122	0.0020164	0.00688302
KIM-M3@42						0.0330748	0.00868987	0.00201562	0.00735282										0.0330696	0.00815335	0.00201655	0.0077536
JH_Loose3_28_06	4-15@2	3717	±	41	95.6951	0.0330639	0.0127776	0.0020177	0.00517388	-0.700763	±	0.255553	6.59753	±	0.103478				0.033086	0.00976568	0.00201782	0.00893785
JH_Loose3_29_03	4-14@1	4050	±	26	95.6951	0.0330654	0.00986166	0.00201675	0.00714359	-0.652402	±	0.197233	6.12561	±	0.142872				0.0330817	0.0102494	0.00201817	0.00740429
JH_Loose3_29_03	4-14@2	4050	±	26	96.8969	0.0330815	0.00596143	0.00201753	0.00614691	-0.158377	±	0.119229	6.51069	±	0.122938				0.0330836	0.0114329	0.00201594	0.00465136
JH_Loose3_30_02	4-13@1	3991	±	30	96.8969	0.0330766	0.00830321	0.0020183	0.00528652	-0.302308	±	0.166064	6.89576	±	0.10573				0.0330722	0.00932351	0.00201635	0.00481256
KIM-E1@1						0.0330722	0.00709991	0.00201483	0.00700204										0.0330816	0.0121394	0.0020164	0.00808232
KIM-E1@2						0.0330536	0.0128952	0.00201511	0.00647782										0.0330755	0.0136798	0.0020186	0.0057933
KIM-E1@3						0.0330727	0.00516239	0.00201479	0.00600147										0.0330715	0.0116684	0.00201739	0.00848127
JH_Loose3_31_08	4-12@2	3883	±	44	98.2106	0.0330684	0.00580299	0.0020172	0.00808842	-0.520389	±	0.11606	6.43063	±	0.161768				0.0330721	0.0071828	0.00201937	0.00561944
JH_Loose3_31_10	4-11@3	3732	±	42	98.7304	0.0330617	0.00864916	0.00201723	0.00825092	-0.703075	±	0.172983	6.44502	±	0.165018				0.0330866	0.00927855	0.00201926	0.00677092
KIM-E4						0.0330708	0.0109038	0.00201525	0.00620356										0.0330776	0.00685231	0.00201768	0.00691768
KIM-E4@0						0.0330614	0.00895479	0.00201527	0.00774656										0.0330719	0.00827728	0.002018	0.00608135
KIM-E4@1						0.0330771	0.00936904	0.00201488	0.00726099										0.0330753	0.0074601	0.00201526	0.00765116
JH_Loose4_32_07	8-15@1	4005	±	23	98.7304	0.0330699	0.0094929	0.00201646	0.00509041	-0.433721	±	0.189858	5.99188	±	0.101808				0.0330719	0.00943745	0.00201572	0.00694165
JH_Loose4_32_08	8-14@1	3992	±	21	96.3258	0.0330768	0.00924501	0.00201753	0.00824722	-0.218141	±	0.1849	6.52534	±	0.164944				0.0330735	0.00879242	0.00201516	0.00619181
JH_Loose4_33_06	8-13@1	4003	±	26	102.299	0.0330638	0.0100563	0.00201447	0.00607915	-0.604001	±	0.201127	5.00636	±	0.121583				0.033071	0.008343	0.00201777	0.00739878
JH_Loose4_33_09	8-12@1	4006	±	28	101.297	0.0330675	0.00835335	0.00201654	0.00738648	-0.486087	±	0.167067	6.03307	±	0.14773				0.0330809	0.0124805	0.00201771	0.00671438
KIM-M3@43						0.0330623	0.0113719	0.0020152	0.00568305										0.0330851	0.00892543	0.00201787	0.00795082
KIM-M3@44						0.033069	0.0113428	0.0020152	0.00515404										0.0330789	0.0105198	0.00201752	0.00644951
KIM-M3@45						0.0330653	0.0103748	0.00201519	0.00605167										0.0330854	0.00803798	0.00201812	0.00676454
JH_Loose4_02_03	5-13@4	3989	±	30	98.6483	0.0330741	0.00866667	0.00201787	0.00713388	-0.254843	±	0.173333	6.72089	±	0.142678				0.033068	0.00872376	0.00201842	0.00601747
JH_Loose4_25_08	7-10 suspect others@5	4127	±	25	102.893	0.0330712	0.00913621	0.00201666	0.00749154	-0.337408	±	0.182724	6.11894	±	0.149831				0.0330728	0.00927295	0.00201541	0.00743656
JH_Loose4_19_02	6-3@3	4080	±	54	99.9516	0.0330659	0.0126525	0.00201947	0.00740246	-0.492851	±	0.253049	7.51241	±	0.148049				0.0330711	0.00754865	0.00201534	0.006761
JH_Loose4_19_02	6-3@4	4080	±	54	100.171	0.0330708	0.0118247	0.00201913	0.00670697	-0.341063	±	0.236493	7.34518	±	0.134139				0.0330748	0.00868987	0.00201562	0.00735282
KIM-M3@46						0.0330727	0.00936543	0.00201527	0.00655949										0.0330702	0.0104252	0.00201774	0.00679044
KIM-M3@47						0.0330744	0.0103961	0.00201483	0.00680095										0.0330639	0.0127776	0.0020177	0.00517388
KIM-M3@48						0.0330572	0.0108792	0.00201498	0.00570589										0.0330654	0.00986166	0.00201675	0.00714359
JH_Loose4_28_09	7-4@2	4063	±	34	100.793	0.033073	0.0127127	0.00201899	0.00669865	-0.242559	±	0.254254	7.29053	±	0.133973				0.0330815	0.00596143	0.00201753	0.00614691
JH_Loose4_36_04	8-10@2	4010	±	27	90.1736	0.0330619	0.00882206	0.00201776	0.00754678	-0.567066	±	0.176441	6.67914	±	0.150936				0.0330766	0.00830321	0.0020183	0.00528652
JH_Loose4_36_04	8-10@3	4010	±	27	101.965	0.0330707	0.0093068	0.00201763	0.00622204	-0.297333	±	0.186136	6.61413	±	0.124441				0.0330817	0.00861823	0.00201809	0.00488156
JH_Loose4_36_04	8-10@4	4010	±	27	101.965	0.033067	0.0120535	0.00201783	0.00801201	-0.402584	±	0.24107	6.71339	±	0.16024				0.0330722	0.00709991	0.00201483	0.00700204
KIM-M3@49						0.0330553	0.00810962	0.00201516	0.00562529										0.0330536	0.0128952	0.00201511	0.00647782
KIM-M3@50						0.0330619	0.00930202	0.00201505	0.00867713										0.0330727	0.00516239	0.00201479	0.00600147
KIM-M3@51						0.0330617	0.0102522	0.0020152	0.00618662										0.0330735	0.00879158	0.00201726	0.00585897
JH_Loose4_37_10	8-9@1	4042	±	40	101.965	0.0330589	0.00728474	0.00201724	0.00832839	-0.627031	±	0.145695	6.36636	±	0.166568				0.0330684	0.00580299	0.0020172	0.00808842
JH_Loose4_37_10	8-9@2	4042	±	40	101.965	0.0330577	0.00981255	0.0020173	0.00674891	-0.658799	±	0.196251	6.39465	±	0.134978				0.0330692	0.00742571	0.00201771	0.00720241
JH_Loose4_38_07	8-8@1	4043	±	42	100.793	0.0330632	0.00781163	0.00201711	0.0069415	-0.486435	±	0.156233	6.30185	±	0.13883				0.0330784	0.00930333	0.00201767	0.0115862
JH_Loose4_38_07	8-8@2	4043	±	42	101.921	0.0330562	0.0113002	0.00201747	0.00713857	-0.695119	±	0.226003	6.48099	±	0.142771				0.0330792	0.00836385	0.00201729	0.00673016
JH_Loose4_38_07	8-8@3	4043	±	42	101.677	0.0330481	0.00922977	0.00201683	0.00893172	-0.932535	±	0.184595	6.1644	±	0.178634				0.0330617	0.00864916	0.00201723	0.00825092
JH_Loose4_39_02	8-7@1	3936	±	44	101.921	0.0330056	0.0118973	0.00201481	0.00545246	-2.21513	±	0.237946	5.16151	±	0.109049				0.0330708	0.0109038	0.00201525	0.00620356
JH_Loose4_39_02	8-7@2	3936	±	44	101.921	0.0330507	0.0107615	0.00201683	0.00478097	-0.845772	±	0.21523	6.16489	±	0.0956195				0.0330614	0.00895479	0.00201527	0.00774656
KIM-M3@52						0.0330687	0.0110717	0.00201507	0.00726743										0.0330771	0.00936904	0.00201488	0.00726099
KIM-M3@53						0.0330573	0.0102066	0.00201536	0.00692267										0.0330699	0.0094929	0.00201646	0.00509041
KIM-M3@54						0.033057	0.0128065	0.0020153	0.00494116										0.0330768	0.00924501	0.00201753	0.00824722
JH_Loose4_39_02	8-7@3	3936	±	44	101.069	0.0330687	0.0138392	0.00201671	0.0055764	-0.280591	±	0.276785	6.11454	±	0.111528				0.0330614	0.0117362	0.00201739	0.0070772
JH_Loose4_40_08	8-5@2	3980	±	47	100.593	0.033064	0.00825409	0.00201697	0.0050345	-0.405234	±	0.165082	6.24802	±	0.10069				0.0330638	0.0100563	0.00201447	0.00607915
JH_Loose4_40_08	8-5@3	3980	±	47	101.985	0.0330577	0.00608148	0.00201711	0.00688217	-0.591548	±	0.12163	6.31651	±	0.137643				0.0330675	0.00835335	0.00201654	0.00738648
JH_Loose4_43_02	8-4@1	3741	±	42	101.985	0.033067	0.008034	0.00201505	0.00734498	-0.306061	±	0.16068	5.29128	±	0.1469				0.033057	0.0084728	0.00201892	0.00461429
KIM-M3@55						0.0330705	0.0095328	0.00201518	0.00823685										0.0330623	0.0113719	0.0020152	0.00568305
KIM-M3@56						0.0330682	0.0092008	0.00201514	0.00608606										0.033069	0.0113428	0.0020152	0.00515404
KIM-M3@57						0.0330666	0.00985427	0.00201494	0.00690146										0.0330653	0.0103748	0.00201519	0.00605167
JH_Loose4_43_02	8-4@2	3741	±	42	101.985	0.0330684	0.00865296	0.00201471	0.00548586	-0.243507	±	0.173059	5.18061	±	0.109717				0.0330746	0.00998088	0.00201807	0.00683294
JH_Loose4_43_03	8-3@1	3963	±	43	101.677	0.0330634	0.0127603	0.00201814	0.00608178	-0.390206	±	0.255206	6.88279	±	0.121636				0.0330741	0.00866667	0.00201787	0.00713388
JH_Loose4_43_03	8-3@2	3963	±	43	103.377	0.0330617	0.00865299	0.0020184	0.00696136	-0.435284	±	0.17306	7.01182	±	0.139227				0.0330712	0.00913621	0.00201666	0.00749154
JH_Loose4_43_05	8-2@1	4018	±	39	103.377	0.0330578	0.00632063	0.00201817	0.00667062	-0.546599	±	0.126413	6.89719	±	0.133412				0.0330659	0.0126525	0.00201947	0.00740246
JH_Loose4_43_05	8-2@2	4018	±	39	99.561	0.0330552	0.0116598	0.00201793	0.00618622	-0.620412	±	0.233196	6.77709	±	0.123724				0.0330708	0.0118247	0.00201913	0.00670697
KIM-M3@58						0.033065	0.0125005	0.00201478	0.00647072										0.0330756	0.00887692	0.00201618	0.00682854
KIM-M3@59						0.0330652	0.0064267	0.0020153	0.00587104										0.0330727	0.00936543	0.00201527	0.00655949
KIM-M3@60						0.0330628	0.00903573	0.002015	0.0085105										0.0330744	0.0103961	0.00201483	0.00680095
JH_Loose 09 02	9-2@3	4026	±	34	98.6343	0.0330509	0.0116219	0.00201368	0.00726697	-0.711873	±	0.232438	4.65755	±	0.145339				0.0330572	0.0108792	0.00201498	0.00570589
JH_Loose 08 02	9-3@2	3919	±	33	98.6343	0.0330609	0.00806234	0.00201726	0.00578932	-0.39885	±	0.161247	6.43565	±	0.115786				0.0330634	0.00852336	0.00201882	0.00568489
KIM-M3@61						0.0330624	0.0105023	0.00201516	0.00618466										0.033073	0.0127127	0.00201899	0.00669865
KIM-M3@62						0.033071	0.00987125	0.00201518	0.00534862										0.0330562	0.00961241	0.00201822	0.00686585
KIM-M3@63						0.0330585	0.0112159	0.00201504	0.00645448										0.0330619	0.00882206	0.00201776	0.00754678
JH_Loose 08 02	9-3@3	3919	±	33	99.561	0.0330597	0.013796	0.00201711	0.00557122	-0.413423	±	0.27592	6.41288	±	0.111424				0.0330707	0.0093068	0.00201763	0.00622204
JH_Loose 08 02	9-3@4	3919	±	33	99.561	0.0330534	0.00890992	0.00201703	0.00666224	-0.59976	±	0.178198	6.37119	±	0.133245				0.033067	0.0120535	0.00201783	0.00801201
JH_Loose 06 01	9-4@1	4019	±	29	99.561	0.0330777	0.00787448	0.00201662	0.00516968	0.141291	±	0.15749	6.1697	±	0.103394				0.0330553	0.00810962	0.00201516	0.00562529
JH_Loose 06 01	9-4@2	4019	±	29	100.623	0.0330548	0.00857964	0.00201665	0.00681579	-0.546856	±	0.171593	6.18111	±	0.136316				0.0330619	0.00930202	0.00201505	0.00867713
JH_Loose 03 04 fl	9-5@1	4031	±	35	100.623	0.0330597	0.00929426	0.00201682	0.00716	-0.394118	±	0.185885	6.26598	±	0.1432				0.0330617	0.0102522	0.0020152	0.00618662
JH_Loose 03 04 fl	9-5@2	4031	±	35	104.371	0.0330559	0.00752839	0.00201697	0.0094233	-0.50363	±	0.150568	6.34389	±	0.188466				0.0330589	0.00728474	0.00201724	0.00832839
KIM-M3@64						0.0330631	0.0111688	0.00201473	0.00677167										0.0330577	0.00981255	0.0020173	0.00674891
KIM-M3@65						0.0330604	0.00666857	0.00201471	0.00624883										0.0330632	0.00781163	0.00201711	0.0069415
KIM-M3@66						0.0330626	0.0113504	0.002015	0.00678092										0.0330562	0.0113002	0.00201747	0.00713857
JH_Loose 01_03	9-6@1	4083	±	42	99.679	0.0330559	0.00840136	0.00201701	0.00661869	-0.482512	±	0.168027	6.37153	±	0.132374				0.0330481	0.00922977	0.00201683	0.00893172
JH_Loose4_49_06	9-7@1	3757	±	37	104.371	0.033049	0.00856541	0.00201736	0.00627897	-0.687613	±	0.171308	6.54523	±	0.125579				0.0330056	0.0118973	0.00201481	0.00545246
JH_Loose4_49_02	9-8@1	4226	±	35	100.667	0.0330673	0.0112242	0.00201684	0.00565242	-0.127416	±	0.224484	6.28567	±	0.113048				0.0330507	0.0107615	0.00201683	0.00478097
JH_Loose4_49_02	9-8@2	4226	±	35	100.342	0.0330831	0.00941962	0.00201669	0.00607753	0.355348	±	0.188392	6.21272	±	0.121551				0.0330687	0.0110717	0.00201507	0.00726743
KIM-M3@67						0.0330658	0.00845002	0.00201497	0.00556743										0.0330573	0.0102066	0.00201536	0.00692267
KIM-M3@68						0.0330611	0.00983467	0.00201523	0.00694129										0.033057	0.0128065	0.0020153	0.00494116
KIM-M3@69						0.0330548	0.00830155	0.00201506	0.00693488										0.0330687	0.0138392	0.00201671	0.0055764
JH_Loose4_48_01	9-10@3	3990	±	36	100.051	0.033063	0.00923356	0.00201743	0.00662648	-0.209806	±	0.184671	6.55107	±	0.13253				0.0330659	0.00870599	0.00201698	0.00657755
JH_Loose4_47_07	9-11@1	3972	±	26	100.051	0.0330589	0.0100193	0.00201427	0.00717392	-0.329611	±	0.200385	4.98383	±	0.143478				0.0330633	0.00904443	0.00201749	0.00755475
JH_Loose4_47_07	9-11@2	3972	±	26	99.9239	0.0330587	0.0123792	0.00201446	0.00746636	-0.332347	±	0.247584	5.07366	±	0.149327				0.033064	0.00825409	0.00201697	0.0050345
JH_Loose4_47_07	9-11@3	3972	±	26	99.9239	0.033045	0.0066329	0.00201378	0.00879705	-0.740746	±	0.132658	4.73619	±	0.175941				0.0330577	0.00608148	0.00201711	0.00688217
KIM-M3@70						0.0330556	0.0117982	0.00201508	0.00630204										0.033067	0.008034	0.00201505	0.00734498
KIM-M3@71						0.0330509	0.00971302	0.00201495	0.00584865										0.0330705	0.0095328	0.00201518	0.00823685
KIM-M3@72						0.0330557	0.00989344	0.00201478	0.00655147										0.0330682	0.0092008	0.00201514	0.00608606
JH_Loose4_46_08	9-12@1	4102	±	33	99.9239	0.033035	0.0132911	0.00201796	0.00619511	-1.02184	±	0.265821	6.78229	±	0.123902				0.0330666	0.00985427	0.00201494	0.00690146
JH_Loose4_45_04	9-13@1	3936	±	31	99.5344	0.0330445	0.00645306	0.00201441	0.00669517	-0.72963	±	0.129061	5.02553	±	0.133903				0.0330684	0.00865296	0.00201471	0.00548586
JH_Loose4_44_03	9-14@1	3939	±	26	100.154	0.0330535	0.0085753	0.00201692	0.00538962	-0.453143	±	0.171506	6.26717	±	0.107792				0.0330634	0.0127603	0.00201814	0.00608178
JH_Loose4_44_02	9-15b@1	3842	±	31	100.384	0.0330629	0.0100003	0.00201652	0.00356542	-0.164251	±	0.200005	6.07016	±	0.0713084				0.0330617	0.00865299	0.0020184	0.00696136
JH_Loose 10 05	10-15@2	3964	±	24	98.5699	0.0330495	0.00577019	0.00201451	0.00682356	-0.559673	±	0.115404	5.07416	±	0.136471				0.0330578	0.00632063	0.00201817	0.00667062
KIM-M3@73						0.0330529	0.00990538	0.00201522	0.00738649										0.0330552	0.0116598	0.00201793	0.00618622
KIM-M3@74						0.0330457	0.01237	0.00201524	0.00663462										0.033079	0.0114479	0.00201764	0.0053175
KIM-M3@75						0.0330631	0.00700238	0.00201514	0.00845611										0.033065	0.0125005	0.00201478	0.00647072
JH_Loose 10 08 fl	10-14@2	3964	±	24	97.8718	0.0330525	0.00866954	0.00201706	0.00697214	-0.441152	±	0.173391	6.23954	±	0.139443				0.0330652	0.0064267	0.0020153	0.00587104
JH_Loose 10 08 fl	10-14@3	3964	±	24	97.8718	0.03305	0.01008	0.00201648	0.00456289	-0.512564	±	0.201601	5.95075	±	0.0912578				0.0330628	0.00903573	0.002015	0.0085105
JH_Loose 10 08 fl	10-14@4	3964	±	24	97.8718	0.0330536	0.0052016	0.00201654	0.00835842	-0.39701	±	0.104032	5.97903	±	0.167168				0.0330579	0.00839838	0.00201759	0.00855677
JH_Loose 11 04 fl	10-13@1	4027	±	37	98.5464	0.0330542	0.00931448	0.00201659	0.0068218	-0.369506	±	0.18629	6.00434	±	0.136436				0.0330553	0.00690494	0.00201433	0.00768595
KIM-M3@76						0.0330662	0.00858346	0.00201532	0.00502381										0.0330644	0.00882905	0.00201467	0.00833516
KIM-M3@77						0.0330616	0.00933945	0.00201524	0.00840287										0.0330509	0.0116219	0.00201368	0.00726697
KIM-M3@78						0.0330613	0.00833697	0.00201546	0.00474628										0.0330637	0.00539791	0.00201738	0.00783845
JH_Loose 12 10	10-12@1	4027	±	37	99.1224	0.0330507	0.0105103	0.00201692	0.00665586	-0.454272	±	0.210207	6.19027	±	0.133117				0.0330609	0.00806234	0.00201726	0.00578932
JH_Loose 12 10	10-12@2	3988	±	32	99.1224	0.0330408	0.00966534	0.00201639	0.00710097	-0.749871	±	0.193307	5.9238	±	0.142019				0.0330624	0.0105023	0.00201516	0.00618466
JH_Loose 13 05	10-11@2	3825	±	31	98.7592	0.0330503	0.00817323	0.00201662	0.0065488	-0.453103	±	0.163465	6.03743	±	0.130976				0.033071	0.00987125	0.00201518	0.00534862
JH_Loose 13 10	10-10@1	3992	±	36	98.081	0.0330532	0.0118335	0.00201383	0.00625751	-0.357511	±	0.23667	4.65595	±	0.12515				0.0330585	0.0112159	0.00201504	0.00645448
KIM-M3@79						0.0330609	0.0088566	0.00201509	0.00473043										0.0330597	0.013796	0.00201711	0.00557122
KIM-M3@80						0.0330528	0.00749908	0.00201528	0.0065392										0.0330534	0.00890992	0.00201703	0.00666224
KIM-M3@81						0.033065	0.0114579	0.00201499	0.00673128										0.0330777	0.00787448	0.00201662	0.00516968
JH_Loose 15 08	10-8@2	4041	±	36	98.5464	0.0330474	0.0109244	0.0020149	0.0072281	-0.504331	±	0.218488	5.25646	±	0.144562				0.0330548	0.00857964	0.00201665	0.00681579
JH_Loose 15 08	10-8@3	4041	±	36	98.5464	0.0330522	0.00849754	0.00201548	0.00545567	-0.351855	±	0.169951	5.54726	±	0.109113				0.0330597	0.00929426	0.00201682	0.00716
JH_Loose 15 08	10-8@4	4041	±	36	98.5464	0.0330513	0.00991485	0.00201503	0.00608825	-0.376679	±	0.198297	5.32047	±	0.121765				0.0330559	0.00752839	0.00201697	0.0094233
JH_Loose 15 08	10-8@5	4027	±	34	98.5464	0.0330543	0.011938	0.00201536	0.00477809	-0.279872	±	0.238761	5.48722	±	0.0955617				0.0330631	0.0111688	0.00201473	0.00677167
KIM-M3@82						0.0330487	0.00863607	0.00201513	0.00663552										0.0330604	0.00666857	0.00201471	0.00624883
KIM-M3@83						0.0330498	0.010364	0.00201482	0.00736103										0.0330626	0.0113504	0.002015	0.00678092
KIM-M3@84						0.0330484	0.0115404	0.0020152	0.0065292										0.0330559	0.00840136	0.00201701	0.00661869
JH_Loose 17 04	10-6@1	3936	±	45	99.8462	0.0330547	0.00773131	0.00201726	0.00745324	-0.241812	±	0.154626	6.46389	±	0.149065				0.033049	0.00856541	0.00201736	0.00627897
JH_Loose 17 04	10-6@2	3948	±	37	99.8462	0.0330534	0.0113835	0.00201676	0.00524462	-0.276318	±	0.227671	6.21426	±	0.104892				0.0330673	0.0112242	0.00201684	0.00565242
JH_Loose 19 01	10-5@2	3948	±	37	100.942	0.0330572	0.00958332	0.00201753	0.00749154	-0.152288	±	0.191666	6.5949	±	0.149831				0.0330831	0.00941962	0.00201669	0.00607753
JH_Loose 20 04	10-4b@1	4094	±	28	99.5088	0.0330382	0.0102829	0.00201581	0.00788955	-0.716621	±	0.205658	5.74479	±	0.157791				0.033049	0.0099919	0.00201295	0.00694444
KIM-M3@85						0.0330598	0.0112547	0.00201505	0.00919765										0.0330548	0.00917866	0.00201377	0.00729452
KIM-M3@86						0.0330391	0.00858418	0.00201469	0.00672384										0.0330658	0.00845002	0.00201497	0.00556743
																			0.0330611	0.00983467	0.00201523	0.00694129
																			0.0330548	0.00830155	0.00201506	0.00693488
																			0.0330525	0.00774697	0.00201705	0.00596744
																			0.033055	0.00684339	0.00201696	0.00643782
																			0.033063	0.00923356	0.00201743	0.00662648
																			0.0330589	0.0100193	0.00201427	0.00717392
																			0.0330587	0.0123792	0.00201446	0.00746636
																			0.033045	0.0066329	0.00201378	0.00879705
																			0.0330556	0.0117982	0.00201508	0.00630204
																			0.0330509	0.00971302	0.00201495	0.00584865
																			0.0330557	0.00989344	0.00201478	0.00655147
																			0.033035	0.0132911	0.00201796	0.00619511
																			0.0330445	0.00645306	0.00201441	0.00669517
																			0.0330535	0.0085753	0.00201692	0.00538962
																			0.0330629	0.0100003	0.00201652	0.00356542
																			0.0330616	0.00806942	0.00201449	0.00738997
																			0.0330495	0.00577019	0.00201451	0.00682356
																			0.0330529	0.00990538	0.00201522	0.00738649
																			0.0330457	0.01237	0.00201524	0.00663462
																			0.0330631	0.00700238	0.00201514	0.00845611
																			0.0330486	0.00828507	0.00201656	0.00483016
																			0.0330525	0.00866954	0.00201706	0.00697214
																			0.03305	0.01008	0.00201648	0.00456289
																			0.0330536	0.0052016	0.00201654	0.00835842
																			0.0330516	0.00954625	0.00201649	0.00642554
																			0.0330542	0.00931448	0.00201659	0.0068218
																			0.0330662	0.00858346	0.00201532	0.00502381
																			0.0330616	0.00933945	0.00201524	0.00840287
																			0.0330613	0.00833697	0.00201546	0.00474628
																			0.0330507	0.0105103	0.00201692	0.00665586
																			0.0330408	0.00966534	0.00201639	0.00710097
																			0.0330544	0.00845545	0.00201642	0.00645729
																			0.0330503	0.00817323	0.00201662	0.0065488
																			0.0330532	0.0118335	0.00201383	0.00625751
																			0.0330464	0.00816437	0.00201464	0.00706503
																			0.0330609	0.0088566	0.00201509	0.00473043
																			0.0330528	0.00749908	0.00201528	0.0065392
																			0.033065	0.0114579	0.00201499	0.00673128
																			0.033058	0.010415	0.00201548	0.00729387
																			0.0330474	0.0109244	0.0020149	0.0072281
																			0.0330522	0.00849754	0.00201548	0.00545567
																			0.0330513	0.00991485	0.00201503	0.00608825
																			0.0330543	0.011938	0.00201536	0.00477809
																			0.0330618	0.00643967	0.0020169	0.00732563
																			0.0330487	0.00863607	0.00201513	0.00663552
																			0.0330498	0.010364	0.00201482	0.00736103
																			0.0330484	0.0115404	0.0020152	0.0065292
																			0.0330547	0.00773131	0.00201726	0.00745324
																			0.0330534	0.0113835	0.00201676	0.00524462
																			0.0330353	0.00670259	0.00201738	0.00871666
																			0.0330572	0.00958332	0.00201753	0.00749154
																			0.0330572	0.0112486	0.00201732	0.00596571
																			0.0330382	0.0102829	0.00201581	0.00788955
																			0.0330598	0.0112547	0.00201505	0.00919765
																			0.0330391	0.00858418	0.00201469	0.00672384

## Sheet: Tab st4
SIMS analysis ID	Age (Ma)	δ30Si (± 2 s.e.)			δ18O (± 2 s.e.)			T (± 2 s.e.) (°C)			Melt SiO2 (± 2 s.e.)(%)			δ18O-melt (± 2 s.e.)			δ30Si-melt (± 2 s.e.)
JH-Hadean
7-10@3	4241	-0.7489	±	0.1529	6.1351	±	0.1058	698.631	±	17.3699	66.5637	±	3.54333	7.7088	±	0.2413	-0.4405	±	0.156296
7-10@4	4241	-0.3192	±	0.1532	5.8046	±	0.1546	698.631	±	17.3699	66.5637	±	3.54333	7.3783	±	0.2663	-0.0108	±	0.156589
6-2@3	4173	-0.1641	±	0.1214	5.9325	±	0.1344	700.354	±	8.3997	71.8053	±	4.81358	7.827	±	0.3238	0.1882	±	0.12836
4-7@1	4142	-0.538	±	0.1669	6.5146	±	0.148	716.8	±	11.4592	61.5276	±	2.37745	7.7801	±	0.2075	-0.2825	±	0.168163
7-10 @5	4127	-0.3374	±	0.156	6.1189	±	0.1303	698.631	±	17.3699	66.5637	±	3.54333	7.6926	±	0.253	-0.029	±	0.15933
7-10@1	4127	-0.4151	±	0.1827	6.2286	±	0.1498	698.631	±	17.3699	66.5637	±	3.54333	7.8023	±	0.2636	-0.1067	±	0.185551
5-10@2	4113	-0.609	±	0.1272	5.7148	±	0.1498	698.631	±	20.2649	59.0008	±	2.5248	6.8256	±	0.2152	-0.3656	±	0.129438
6-7@1	4108	-0.4561	±	0.1423	6.1962	±	0.1826	701.487	±	25.3489	56.55	±	1.54125	7.1571	±	0.2055	-0.2351	±	0.143371
4-6@1	4096	-0.365	±	0.137	6.4459	±	0.1384	671.586	±	15.9154	61.7928	±	3.43909	7.7276	±	0.2519	-0.0821	±	0.140851
4-6@2	4096	-0.5306	±	0.1655	6.6037	±	0.1216	671.586	±	15.9154	61.7928	±	3.43909	7.8854	±	0.2431	-0.2477	±	0.168702
5-14@1	4093	-0.2457	±	0.1159	6.3549	±	0.1825	759.191	±	29.3329	67.8244	±	3.43167	8.0058	±	0.2782	0.0372	±	0.119896
5-14@2	4093	-0.7638	±	0.1853	6.3574	±	0.1115	759.191	±	29.3329	67.8244	±	3.43167	8.0083	±	0.2378	-0.4809	±	0.187825
5-14@3	4093	-0.0919	±	0.2002	6.3887	±	0.1478	759.191	±	29.3329	67.8244	±	3.43167	8.0396	±	0.2568	0.191	±	0.20254
4-9@1	4085	-0.2856	±	0.2104	6.393	±	0.129	706.304	±	12.3745	61.762	±	1.91172	7.6728	±	0.1742	-0.0226	±	0.211126
6-13@1	4083	-0.5817	±	0.1067	6.9603	±	0.1398	683.022	±	18.5608	59.8312	±	1.93786	8.122	±	0.1833	-0.3229	±	0.108546
6-13@2	4083	-0.0625	±	0.1823	6.8641	±	0.1155	683.022	±	18.5608	59.8312	±	1.93786	8.0258	±	0.1655	0.1963	±	0.183386
6-3@1	4080	-0.1426	±	0.1367	7.4093	±	0.1354	706.304	±	11.2985	73.7997	±	5.18684	9.4258	±	0.3451	0.2223	±	0.143825
6-3@3	4080	-0.4929	±	0.253	7.5124	±	0.148	706.304	±	11.2985	73.7997	±	5.18684	9.5289	±	0.3502	-0.128	±	0.25692
6-3@4	4080	-0.3411	±	0.2365	7.3452	±	0.1341	706.304	±	11.2985	73.7997	±	5.18684	9.3617	±	0.3446	0.0238	±	0.240688
4-10@1	4063	-0.083	±	0.1608	6.6893	±	0.1353	692.364	±	13.5378	61.8991	±	2.08012	7.9775	±	0.1858	0.1888	±	0.161997
4-10@2	4063	-0.603	±	0.1745	6.8371	±	0.1203	692.364	±	13.5378	61.8991	±	2.08012	8.1253	±	0.1752	-0.3312	±	0.175604
4-1@1	4052	0.0034212	±	0.1268	6.0178	±	0.1153	702.468	±	9.9052	62.1233	±	1.61824	7.3197	±	0.152	0.2715	±	0.127666
4-1@2	4052	-0.2288	±	0.2204	6.0113	±	0.127	702.468	±	9.9052	62.1233	±	1.61824	7.3132	±	0.1611	0.0393	±	0.220899
4-1@3	4052	-0.0746	±	0.2062	5.8089	±	0.1377	702.468	±	9.9052	62.1233	±	1.61824	7.1108	±	0.1696	0.1935	±	0.206733
4-1@4	4052	-0.6578	±	0.1631	5.8828	±	0.1551	702.468	±	9.9052	62.1233	±	1.61824	7.1847	±	0.184	-0.3897	±	0.163774
4-14@1	4050	-0.6524	±	0.1972	6.1256	±	0.1429	577.639	±	33.5677	51.456	±	0.705646	6.7747	±	0.1493	-0.4195	±	0.198213
4-14@2	4050	-0.1584	±	0.1192	6.5107	±	0.1229	577.639	±	33.5677	51.456	±	0.705646	7.1598	±	0.1303	0.0745	±	0.120869
7-9@1	4049	-0.575	±	0.1911	6.7738	±	0.1605	678.004	±	11.8906	56.2235	±	0.816392	7.7147	±	0.1681	-0.3459	±	0.191326
6-1@1	4046	-0.5366	±	0.1067	7.0373	±	0.1106	649.519	±	13.389	56.306	±	2.24763	7.9832	±	0.1765	-0.2923	±	0.109064
8-8@1	4043	-0.4864	±	0.1562	6.3019	±	0.1388	691.281	±	10.4172	63.6849	±	3.85786	7.6994	±	0.2739	-0.1984	±	0.159911
8-8@2	4043	-0.6951	±	0.226	6.481	±	0.1428	691.281	±	10.4172	63.6849	±	3.85786	7.8785	±	0.2759	-0.4071	±	0.228581
8-8@3	4043	-0.9325	±	0.1846	6.1644	±	0.1786	691.281	±	10.4172	63.6849	±	3.85786	7.5619	±	0.296	-0.6445	±	0.187751
8-9@1	4042	-0.627	±	0.1457	6.3664	±	0.1666	605.634	±	23.6733	58.1117	±	1.07762	7.4228	±	0.1792	-0.3387	±	0.146963
8-9@2	4042	-0.6588	±	0.1963	6.3946	±	0.135	605.634	±	23.6733	58.1117	±	1.07762	7.451	±	0.1502	-0.3705	±	0.19724
10-8@2	4041	-0.5043	±	0.2185	5.2565	±	0.1446	701.063	±	9.4738	72.5198	±	4.63557	7.1947	±	0.3184	-0.1464	±	0.22218
10-8@3	4041	-0.3519	±	0.17	5.5473	±	0.1091	701.063	±	9.4738	72.5198	±	4.63557	7.4855	±	0.304	0.0059511	±	0.174704
10-8@4	4041	-0.3767	±	0.1983	5.3205	±	0.1218	701.063	±	9.4738	72.5198	±	4.63557	7.2587	±	0.3087	-0.0188	±	0.202348
7-13@1	4038	-0.7064	±	0.1918	6.2593	±	0.1299	654.862	±	15.3505	57.4344	±	1.53998	7.2743	±	0.1605	-0.4543	±	0.19253
7-8b@1	4032	-0.5067	±	0.1386	6.6067	±	0.1125	709.615	±	20.8582	62.63	±	6.06858	7.9397	±	0.3881	-0.2382	±	0.148133
9-5@1	4031	-0.3941	±	0.1859	6.266	±	0.1432	691.436	±	9.1593	62.625	±	2.37596	7.5986	±	0.2041	-0.1154	±	0.187128
9-5@2	4031	-0.5036	±	0.1506	6.3439	±	0.1885	691.436	±	9.1593	62.625	±	2.37596	7.6765	±	0.2381	-0.2249	±	0.152113
10-12@1	4027	-0.4543	±	0.2102	6.1903	±	0.1331	665.727	±	10.2664	61.7668	±	1.90151	7.4704	±	0.1768	-0.1681	±	0.211022
10-8@5	4027	-0.2799	±	0.2388	5.4872	±	0.0956	701.063	±	9.4738	70.7195	±	2.72152	7.3152	±	0.192	0.0625	±	0.240025
9-2@3	4026	-0.7119	±	0.2324	4.6576	±	0.1453	690.969	±	12.3205	50.9754	±	0.250653	5.2773	±	0.1461	-0.5347	±	0.232454
9-4@1	4019	0.1413	±	0.1575	6.1697	±	0.1034	679.588	±	16.4174	58.9644	±	1.74906	7.2783	±	0.1488	0.3942	±	0.158515
9-4@2	4019	-0.5469	±	0.1716	6.1811	±	0.1363	679.588	±	16.4174	58.9644	±	1.74906	7.2897	±	0.1733	-0.294	±	0.172532
8-2@1	4018	-0.5466	±	0.1264	6.8972	±	0.1334	693.891	±	15.0045	69.4953	±	5.70325	8.6503	±	0.3737	-0.2097	±	0.136158
8-2@2	4018	-0.6204	±	0.2332	6.7771	±	0.1237	693.891	±	15.0045	69.4953	±	5.70325	8.5302	±	0.3703	-0.2835	±	0.23863
7-5@1	4014	-0.3061	±	0.242	6.5636	±	0.1416	692.671	±	9.0492	61.9135	±	3.08761	7.8527	±	0.2361	-0.0343	±	0.243542
7-5@2	4014	-0.3143	±	0.1165	6.6967	±	0.1667	692.671	±	9.0492	61.9135	±	3.08761	7.9858	±	0.252	-0.0425	±	0.119669
4-5@2	4010	-0.0968	±	0.1856	7.2294	±	0.1354	746.827	±	15.836	57.3334	±	1.34108	8.2382	±	0.1583	0.1111	±	0.186007
8-10@2	4010	-0.5671	±	0.1764	6.6791	±	0.1509	700.78	±	11.0593	57.5185	±	1.21272	7.6992	±	0.1682	-0.3375	±	0.176782
8-10@3	4010	-0.2973	±	0.1861	6.6141	±	0.1244	700.78	±	11.0593	57.5185	±	1.21272	7.6342	±	0.1449	-0.0677	±	0.186462
8-10@4	4010	-0.4026	±	0.2411	6.7134	±	0.1602	700.78	±	11.0593	57.5185	±	1.21272	7.7335	±	0.1766	-0.173	±	0.24138
5-15@1	4007	-0.5322	±	0.2029	6.4313	±	0.1377	668.701	±	16.786	57.8132	±	1.45936	7.4695	±	0.1641	-0.284	±	0.203532
5-15@2	4007	-0.2079	±	0.1659	6.5405	±	0.1127	668.701	±	16.786	57.8132	±	1.45936	7.5787	±	0.1438	0.0403	±	0.166672
5-15@3	4007	-0.3029	±	0.1344	6.5331	±	0.1391	668.701	±	16.786	57.8132	±	1.45936	7.5713	±	0.1653	-0.0547	±	0.135352
8-12@1	4006	-0.4861	±	0.1671	6.0331	±	0.1477	702.607	±	12.2605	67.9395	±	4.62532	7.691	±	0.3193	-0.1684	±	0.171879
6-8@1	4005	-0.5308	±	0.1364	6.6194	±	0.1457	684.862	±	16.4009	60.0064	±	2.97666	7.7918	±	0.2333	-0.2715	±	0.139203
8-15@1	4005	-0.4337	±	0.1899	5.9919	±	0.1018	692.671	±	14.5708	90.5873	±	14.6217	9.0358	±	0.9006	0.0877	±	0.229157
6-9b@1	4003	-0.1966	±	0.1971	6.6582	±	0.1076	769.619	±	11.5238	63.2521	±	2.42531	8.0292	±	0.1833	0.0465	±	0.198003
5-3@1	4002	-0.0091722	±	0.2148	6.6424	±	0.1545	627.735	±	27.1039	56.0615	±	1.4254	7.5734	±	0.1774	0.2446	±	0.215814
JH-Archean
4-2@1	3999	-0.1568	±	0.1953	6.5164	±	0.1788	670.442	±	26.8395	57.6152	±	1.78887	7.5425	±	0.2097	0.0887	±	0.196478
4-2@2	3999	-0.2817	±	0.205	6.6856	±	0.1481	670.442	±	26.8395	57.6152	±	1.78887	7.7117	±	0.1842	-0.0362	±	0.206122
6-14@1	3999	-0.2535	±	0.2191	6.6403	±	0.1752	677.648	±	16.9206	59.8889	±	1.28424	7.8055	±	0.192	0.008733	±	0.219602
6-14@2	3999	-0.7929	±	0.1912	6.5366	±	0.1232	677.648	±	16.9206	59.8889	±	1.28424	7.7018	±	0.1461	-0.5307	±	0.191775
7-12@1	3999	0.0283	±	0.1718	6.7401	±	0.1218	692.671	±	16.8715	61.8502	±	2.11275	8.0253	±	0.1776	0.2995	±	0.173041
10-10@1	3992	-0.3575	±	0.2367	4.656	±	0.1252	639.417	±	12.2846	56.5981	±	1.34664	5.6198	±	0.1499	-0.1049	±	0.237162
8-14@1	3992	-0.2181	±	0.1849	6.5253	±	0.1649	734.025	±	10.4247	68.8878	±	3.43811	8.2412	±	0.2673	0.0876	±	0.187044
4-13@1	3991	-0.3023	±	0.1661	6.8958	±	0.1057	774.144	±	6.9583	59.87	±	1.72688	8.0598	±	0.1495	-0.0863	±	0.166616
7-7@1	3991	-0.0574	±	0.1206	6.9058	±	0.1321	694.194	±	25.6893	64.9254	±	4.16025	8.3792	±	0.2868	0.2396	±	0.126873
7-7@2	3991	0.0631	±	0.1142	6.8776	±	0.1351	694.194	±	25.6893	64.9254	±	4.16025	8.351	±	0.2882	0.3601	±	0.120806
9-10@3	3990	-0.2098	±	0.1847	6.5511	±	0.1325	682.853	±	10.1412	55.1548	±	1.02326	7.4266	±	0.1466	0.0075197	±	0.184981
5-2@1	3989	-0.4357	±	0.1872	6.4157	±	0.0966	651.88	±	18.8792	57.602	±	1.15312	7.4409	±	0.1196	-0.1804	±	0.187809
5-2@2	3989	-0.4073	±	0.1576	6.1711	±	0.1534	651.88	±	18.8792	57.602	±	1.15312	7.1963	±	0.1689	-0.152	±	0.158323
5-2@3	3989	-0.3665	±	0.1419	6.5045	±	0.1214	651.88	±	18.8792	57.602	±	1.15312	7.5297	±	0.1404	-0.1112	±	0.142703
10-12@2	3988	-0.7499	±	0.1933	5.9238	±	0.142	665.727	±	10.2664	61.7668	±	1.90151	7.2039	±	0.1836	-0.4637	±	0.194193
6-5@1	3987	-0.3001	±	0.22	7.0888	±	0.1724	738.421	±	8.7226	61.8188	±	3.307	8.3721	±	0.2659	-0.0531	±	0.221601
6-5@2	3987	-0.0662	±	0.2177	6.9941	±	0.1415	738.421	±	8.7226	61.8188	±	3.307	8.2774	±	0.2469	0.1808	±	0.219318
5-5@1	3981	-0.7074	±	0.1925	6.8404	±	0.1526	657.093	±	14.549	64.269	±	1.98638	8.2737	±	0.1951	-0.3923	±	0.193651
5-5@2	3981	-0.5771	±	0.1641	6.8374	±	0.1449	657.093	±	14.549	64.269	±	1.98638	8.2707	±	0.1891	-0.262	±	0.165449
5-8@1	3981	-0.5419	±	0.1443	7.03	±	0.1363	628.342	±	15.7268	75.7157	±	5.43331	9.1638	±	0.3594	-0.092	±	0.154973
5-8@2	3981	-0.5331	±	0.2106	6.8336	±	0.1035	628.342	±	15.7268	75.7157	±	5.43331	8.9674	±	0.3483	-0.0832	±	0.218052
8-5@2	3980	-0.4052	±	0.1651	6.248	±	0.1007	659.917	±	14.5483	58.4952	±	1.44089	7.3279	±	0.1339	-0.1459	±	0.165843
8-5@3	3980	-0.5915	±	0.1216	6.3165	±	0.1376	659.917	±	14.5483	58.4952	±	1.44089	7.3964	±	0.1634	-0.3322	±	0.122608
9-11@1	3972	-0.3296	±	0.2004	4.9838	±	0.1435	682.004	±	13.637	54.8907	±	0.717365	5.8431	±	0.1501	-0.1142	±	0.200596
9-11@2	3972	-0.3323	±	0.2476	5.0737	±	0.1493	682.004	±	13.637	54.8907	±	0.717365	5.933	±	0.1556	-0.1169	±	0.247759
9-11@3	3972	-0.7407	±	0.1327	4.7362	±	0.1759	682.004	±	13.637	54.8907	±	0.717365	5.5955	±	0.1813	-0.5253	±	0.132996
10-14@2	3964	-0.4412	±	0.1734	6.2395	±	0.1394	665.929	±	10.8476	59.9481	±	1.75008	7.4083	±	0.1758	-0.1718	±	0.174258
10-14@3	3964	-0.5126	±	0.2016	5.9507	±	0.0913	665.929	±	10.8476	59.9481	±	1.75008	7.1195	±	0.1407	-0.2432	±	0.202339
10-14@4	3964	-0.397	±	0.104	5.979	±	0.1672	665.929	±	10.8476	59.9481	±	1.75008	7.1478	±	0.1986	-0.1276	±	0.105425
10-15@2	3964	-0.5597	±	0.1154	5.0742	±	0.1365	735.062	±	20.6576	52.4368	±	0.574939	5.7833	±	0.141	-0.386	±	0.115711
7-3@1	3955	-0.3678	±	0.1651	7.0742	±	0.119	712.191	±	17.815	67.5165	±	4.83553	8.7062	±	0.319	-0.0598	±	0.170346
7-3@2	3955	-0.1978	±	0.1764	6.9849	±	0.1344	712.191	±	17.815	67.5165	±	4.83553	8.6169	±	0.325	0.1102	±	0.18132
7-3@3	3955	-0.3111	±	0.1659	7.1327	±	0.1687	712.191	±	17.815	67.5165	±	4.83553	8.7647	±	0.3406	-0.003136	±	0.171122
10-5@2	3948	-0.1523	±	0.1917	6.5949	±	0.1498	613.176	±	20.5548	59.7178	±	3.13654	7.7496	±	0.2435	0.1477	±	0.19492
10-6@2	3948	-0.2763	±	0.2277	6.2143	±	0.1049	674.204	±	11.4364	63.8468	±	2.88272	7.6217	±	0.2053	0.0237	±	0.229304
6-6@1	3943	-0.6298	±	0.1383	6.4428	±	0.1251	710.005	±	12.5989	99.53	±	17.5742	10.034	±	1.0828	-0.0515	±	0.202846
9-14@1	3939	-0.4531	±	0.1715	6.2672	±	0.1078	686.342	±	17.957	73.3992	±	6.74612	8.2592	±	0.4267	-0.0764	±	0.182078
10-6@1	3936	-0.2418	±	0.1546	6.4639	±	0.1491	674.204	±	11.4364	63.8468	±	2.88272	7.8713	±	0.231	0.0582	±	0.156952
8-7@1	3936	-2.2151	±	0.2379	5.1615	±	0.109	671.586	±	14.2102	57.2785	±	1.31347	6.1669	±	0.1354	-1.9732	±	0.238311
8-7@2	3936	-0.8458	±	0.2152	6.1649	±	0.0956	671.586	±	14.2102	57.2785	±	1.31347	7.1703	±	0.1249	-0.6039	±	0.215654
8-7@3	3936	-0.2806	±	0.2768	6.1145	±	0.1115	671.586	±	14.2102	57.2785	±	1.31347	7.1199	±	0.1375	-0.0387	±	0.277153
9-13@1	3936	-0.7296	±	0.1291	5.0255	±	0.1339	698.92	±	12.125	70.8303	±	4.54827	6.8603	±	0.3089	-0.3847	±	0.135162
5-4@1	3926	-0.1835	±	0.1836	6.7362	±	0.0985	696.879	±	13.9861	55.9357	±	1.12953	7.6595	±	0.1203	0.0343	±	0.183966
9-3@2	3919	-0.3988	±	0.1612	6.4356	±	0.1158	652.345	±	17.3935	60.8759	±	1.47673	7.6612	±	0.1469	-0.1127	±	0.162164
9-3@3	3919	-0.4134	±	0.2759	6.4129	±	0.1114	652.345	±	17.3935	60.8759	±	1.47673	7.6385	±	0.1434	-0.1273	±	0.276464
9-3@4	3919	-0.5998	±	0.1782	6.3712	±	0.1332	652.345	±	17.3935	60.8759	±	1.47673	7.5968	±	0.161	-0.3137	±	0.179073
7-1@1	3897	-0.1561	±	0.1505	6.5864	±	0.1459	671.396	±	17.4652	62.2567	±	1.84346	7.8965	±	0.1844	0.1312	±	0.151805
4-8@1	3895	-0.1026	±	0.1785	6.5672	±	0.159	687.962	±	22.4906	64.8676	±	2.35003	8.0371	±	0.2144	0.1978	±	0.180241
4-12@2	3883	-0.5204	±	0.1161	6.4306	±	0.1618	667.325	±	12.8692	59.561	±	1.55963	7.5757	±	0.1879	-0.2554	±	0.117204
5-11@1	3882	-0.4732	±	0.1913	7.0612	±	0.1352	613.894	±	22.8842	69.5867	±	3.31559	8.8199	±	0.2438	-0.0718	±	0.195437
5-11@2	3882	-0.2462	±	0.2196	6.8066	±	0.1355	613.894	±	22.8842	69.5867	±	3.31559	8.5653	±	0.244	0.1552	±	0.223213
6-12@1	3853	-0.3681	±	0.1731	7.1846	±	0.1126	641.529	±	57.3964	70.5584	±	7.36736	9.0028	±	0.4647	0.0188	±	0.193485
10-11@2	3825	-0.4531	±	0.1635	6.0374	±	0.131	638.881	±	26.8648	57.9492	±	1.61291	7.0839	±	0.164	-0.187	±	0.165003
5-7@1	3800	-0.4784	±	0.2681	6.5587	±	0.1493	653.498	±	14.4309	61.4326	±	1.9849	7.8184	±	0.1925	-0.1877	±	0.268909
5-7@2	3800	-0.4159	±	0.2332	6.4663	±	0.1331	653.498	±	14.4309	61.4326	±	1.9849	7.726	±	0.1802	-0.1252	±	0.23413
9-7@1	3757	-0.6876	±	0.1713	6.5452	±	0.1256	674.572	±	11.2098	62.4905	±	2.4607	7.8696	±	0.1961	-0.4001	±	0.172873
4-15@2	3717	-0.7008	±	0.2556	6.5975	±	0.1035	683.862	±	11.0434	59.0788	±	1.53855	7.7131	±	0.1399	-0.4491	±	0.25603
Sample ID		δ30Si		2s.d.		δ18O*
Hole 1274A
5R2		-0.262273	±	0.118058	4.78
6R3		-0.260263	±	0.161146	-
8R1		-0.306439	±	0.0360475	-
11R1		-0.312238	±	0.069134	-
16R2		-0.321645	±	0.0456413	-
27R3		-0.291122	±	0.070895	-
Hole 1268A
2R2 27-35		-0.380579	±	0.120332	2.3667
4R1 44-55		-0.321026	±	0.134746	-
13R1 46-55		-0.358761	±	0.0713185	-
19R1 34-43		-0.219603	±	0.106167	-
20R1 100-110		-0.290179	±	0.0992696	-
23R3 92-98		-0.298953	±	0.0652061	-
6R1 100-106		-0.310297	±	0.11165	-
2R2 83-89		-0.35545	±	0.0501901	-
8R2 14-20		-0.388485	±	0.106222	-
19R4 61-67		-0.316472	±	0.139796	-
12R1 41-46		-0.37682	±	0.118625	-
*From Barnes et al., 2009

## Sheet: Table ST5
Oxide	Measured glass concentration (%) (1100 °C)			Target concentration (%)		Measured glass concentration (%) (1300 °C)			Target concentration (%)		Experiment name	Duration (hrs)	T (°C)	P (Gpa)
Na2O	3.42198	±	0.0912013	2.96987		3.51373	±	0.0671272	2.9912		RT_Pk_1_11(II)	168	1100	1
Al2O3	14.373	±	0.40796	13.3459		14.2086	±	0.273806	13.4417		RT_Pk_1_13(II)	48	1300	1
K2O	3.62716	±	0.0858915	3.14269		3.66359	±	0.0906983	3.16527
CaO	2.43893	±	0.0311695	2.42552		2.45712	±	0.0584818	2.44294
SrO	3.08731	±	0.116887	3.45795		3.03575	±	0.0712143	2.80718
Y2O3	0.0668558	±	0.00104637	0.0744671		0.0640471	±	0.00145935	0.0601835
ZrO2	1.71865	±	0.313007	2.16512		1.71865	±	0.313007	5.53464
Nb2O5	0.14221	±	0.0046102	0.169119		0.140138	±	0.00239034	0.135617
Dy2O3	0.0631801	±	0.00176453	0.0780132		0.0607126	±	0.00136794	0.0544054
Yb2O3	0.0551584	±	0.00147292	0.0756946		0.0539742	±	0.00112906	0.0539602
ThO2	0.0637683	±	0.00264763	0.0791043		0.0609322	±	0.00134604	0.0539317
SiO2 (Internal standard)	61.8867	-	-	61.89		62.3009	-	-	62.3009
H2O	-	-	-	10.1299		-	-	-	10.0464
Element	Measured zircon concentration (ppm) (1100 °C)					Measured zircon concentration (ppm) (1300 °C)
Al	35.5*	±	18.1865			70.6667	±	13.3555
Sr	6.04	±	3.87952			1.695	±	0.682817
Y	1525	±	321.986			841.167	±	129.279
Nb	32.925	±	6.13326			10.4667	±	1.2487
Dy	1207.5	±	382.516			592.833	±	96.4669
Yb	2785	±	481.378			1850	±	190.904
Th	405.25	±	104.521			179.167	±	28.1244
* The average contains measured values that were below the Limit of Detection
